# Supplementary material
Source: PubMed Central journal article supplement (PMC4792228)
Supplement: me-15-1194.pdf [file me-15-1194.pdf]

**Supplemental Table 1: Summary of primary antibodies used with corresponding target protein, manufacturer, species raised in and dilution used**

| Peptide/protein target         | Name of Antibody                                            | Manufacturer, catalog #, and/or name of individual providing the antibody | Species raised in; monoclonal or polyclonal | Dilution used |
|--------------------------------|-------------------------------------------------------------|---------------------------------------------------------------------------|---------------------------------------------|---------------|
| Total IGFBP-1                  | Anti human IGFBP-1 monoclonal 6303                          | Medix Biochemica                                                          | Mouse;<br>Monoclonal                        | 1:10000       |
| Total IGFBP-1                  | Anti human IGFBP-1 polyclonal                               | Dr. Rob C Baxter                                                          | Rabbit;<br>Polyclonal                       | 1:10000       |
| Phospho-IGFBP-1 (S101)         | Phospho-IGFBP-1 (S101)                                      | YenZym                                                                    | Rabbit;<br>Polyclonal                       | 1:1000        |
| Phospho-IGFBP-1 (S119)         | Phospho-IGFBP-1 (S119)                                      | YenZym                                                                    | Rabbit;<br>Polyclonal                       | 1:1000        |
| Phospho-IGFBP-1 (S169)         | Phospho-IGFBP-1 (S169)                                      | YenZym                                                                    | Rabbit;<br>Polyclonal                       | 1:1000        |
| $\beta$ -actin                 | $\beta$ -actin (8H10D10) Mouse mAb                          | Cell signaling, #3700                                                     | Mouse;<br>Monoclonal                        | 1:3000        |
| Phospho-4EBP-1 (T70)           | Phospho-4E-BP1 (Thr70) Antibody                             | Cell signaling, #9455                                                     | Rabbit;<br>Polyclonal                       | 1:1000        |
| Total 4EBP-1                   | 4EBP-1 Antibody                                             | Cell signaling, #9452                                                     | Rabbit;<br>Polyclonal                       | 1:1000        |
| Phospho-Akt (S473)             | Phospho-Akt (Ser473) (D9E) XP® Rabbit mAb                   | Cell signaling, #4060                                                     | Rabbit;<br>Monoclonal                       | 1:1000        |
| Total Akt                      | Akt Antibody                                                | Cell signaling, #9272                                                     | Rabbit;<br>Polyclonal                       | 1:1000        |
| Phospho-IGF-1R $\beta$ (Y1135) | Phospho-IGF-1 Receptor $\beta$ (Tyr1135) (DA7A8) Rabbit mAb | Cell signaling, #3918                                                     | Rabbit;<br>Monoclonal                       | 1:1000        |
| Total IGF-1R $\beta$           | IGF-1R $\beta$ (C-20)                                       | Santa Cruz Biotechnology, sc-713                                          | Rabbit;<br>Polyclonal                       | 1:1000        |
| Raptor                         | Raptor (24C12) Rabbit mAb                                   | Cell signaling, #2280                                                     | Rabbit;<br>Monoclonal                       | 1:1000        |
| Rictor                         | Rictor (53A2) Rabbit mAb                                    | Cell signaling, #2114                                                     | Rabbit;<br>Monoclonal                       | 1:1000        |
| TSC2                           | Tuberin/TSC2 (D93F12) Rabbit mAb                            | Cell signalling, #4308                                                    | Rabbit;<br>Monoclonal                       | 1:1000        |
| DEPTOR                         | DEPTOR/DEPDC6 (D9F5) Rabbit mAb                             | Cell signalling, #11816                                                   | Rabbit;<br>Monoclonal                       | 1:1000        |

**Supplemental Table 2. Dataset for MRM transitions used to detect IGF1P-1 phosphorylated peptides**

| Precursor ions | Transitions | Peptide Sequence                                           | Collision Energy |
|----------------|-------------|------------------------------------------------------------|------------------|
| 765.92         | 1346.72     | sequence1.ALPGEQQPLHALTR.+2y12.light                       | 36               |
| 765.92         | 807.48      | sequence1.ALPGEQQPLHALTR.+2y7.light                        | 36               |
| 765.92         | 673.86      | sequence1.ALPGEQQPLHALTR.+2y12+2.light                     | 36               |
| 765.92         | 404.25      | sequence1.ALPGEQQPLHALTR.+2y7+2.light                      | 36               |
| 765.92         | 724.36      | sequence1.ALPGEQQPLHALTR.+2b7.light                        | 36               |
| 765.92         | 1071.56     | sequence1.ALPGEQQPLHALTR.+2b10.light                       | 36               |
| 773.32         | 575.26      | sequence1.AQETS[Pho]GEEIS[Pho]KFYLPNC[CAM]NK.+3y5.light    | 40               |
| 773.32         | 261.16      | sequence1.AQETS[Pho]GEEIS[Pho]KFYLPNC[CAM]NK.+3y2.light    | 40               |
| 773.32         | 944.88      | sequence1.AQETS[Pho]GEEIS[Pho]KFYLPNC[CAM]NK.+3y15+2.light | 40               |
| 773.32         | 861.38      | sequence1.AQETS[Pho]GEEIS[Pho]KFYLPNC[CAM]NK.+3y14+2.light | 40               |
| 773.32         | 426.21      | sequence1.AQETS[Pho]GEEIS[Pho]KFYLPNC[CAM]NK.+3y7+2.light  | 40               |
| 773.32         | 574.59      | sequence1.AQETS[Pho]GEEIS[Pho]KFYLPNC[CAM]NK.+3y14+3.light | 40               |
| 773.32         | 376.20      | sequence1.AQETS[Pho]GEEIS[Pho]KFYLPNC[CAM]NK.+3y9+3.light  | 40               |
| 773.32         | 230.12      | sequence1.AQETS[Pho]GEEIS[Pho]KFYLPNC[CAM]NK.+3y6+3.light  | 40               |
| 773.32         | 200.10      | sequence1.AQETS[Pho]GEEIS[Pho]KFYLPNC[CAM]NK.+3b2.light    | 40               |
| 773.32         | 329.15      | sequence1.AQETS[Pho]GEEIS[Pho]KFYLPNC[CAM]NK.+3b3.light    | 40               |
| 773.32         | 215.60      | sequence1.AQETS[Pho]GEEIS[Pho]KFYLPNC[CAM]NK.+3b4+2.light  | 40               |
| 773.32         | 734.28      | sequence1.AQETS[Pho]GEEIS[Pho]KFYLPNC[CAM]NK.+3b12+2.light | 40               |
| 773.32         | 1086.42     | sequence1.AQETS[Pho]GEEIS[Pho]KFYLPNC[CAM]NK.+3b18+2.light | 40               |
| 773.32         | 199.74      | sequence1.AQETS[Pho]GEEIS[Pho]KFYLPNC[CAM]NK.+3b5+3.light  | 40               |
| 773.32         | 218.74      | sequence1.AQETS[Pho]GEEIS[Pho]KFYLPNC[CAM]NK.+3b6+3.light  | 40               |
| 773.32         | 342.47      | sequence1.AQETS[Pho]GEEIS[Pho]KFYLPNC[CAM]NK.+3b9+3.light  | 40               |
| 773.32         | 489.85      | sequence1.AQETS[Pho]GEEIS[Pho]KFYLPNC[CAM]NK.+3b12+3.light | 40               |
| 773.32         | 652.27      | sequence1.AQETS[Pho]GEEIS[Pho]KFYLPNC[CAM]NK.+3b16+3.light | 40               |
| 746.66         | 575.26      | sequence1.AQETSGEEIS[Pho]KFYLPNC[CAM]NK.+3y5.light         | 38               |
| 746.66         | 261.16      | sequence1.AQETSGEEIS[Pho]KFYLPNC[CAM]NK.+3y2.light         | 38               |
| 746.66         | 904.90      | sequence1.AQETSGEEIS[Pho]KFYLPNC[CAM]NK.+3y15+2.light      | 38               |
| 746.66         | 861.38      | sequence1.AQETSGEEIS[Pho]KFYLPNC[CAM]NK.+3y14+2.light      | 38               |
| 746.66         | 426.21      | sequence1.AQETSGEEIS[Pho]KFYLPNC[CAM]NK.+3y7+2.light       | 38               |
| 746.66         | 574.59      | sequence1.AQETSGEEIS[Pho]KFYLPNC[CAM]NK.+3y14+3.light      | 38               |
| 746.66         | 376.20      | sequence1.AQETSGEEIS[Pho]KFYLPNC[CAM]NK.+3y9+3.light       | 38               |
| 746.66         | 230.12      | sequence1.AQETSGEEIS[Pho]KFYLPNC[CAM]NK.+3y6+3.light       | 38               |
| 746.66         | 200.10      | sequence1.AQETSGEEIS[Pho]KFYLPNC[CAM]NK.+3b2.light         | 38               |
| 746.66         | 329.15      | sequence1.AQETSGEEIS[Pho]KFYLPNC[CAM]NK.+3b3.light         | 38               |
| 746.66         | 215.60      | sequence1.AQETSGEEIS[Pho]KFYLPNC[CAM]NK.+3b4+2.light       | 38               |
| 746.66         | 694.29      | sequence1.AQETSGEEIS[Pho]KFYLPNC[CAM]NK.+3b12+2.light      | 38               |
| 746.66         | 1046.44     | sequence1.AQETSGEEIS[Pho]KFYLPNC[CAM]NK.+3b18+2.light      | 38               |
| 746.66         | 173.08      | sequence1.AQETSGEEIS[Pho]KFYLPNC[CAM]NK.+3b5+3.light       | 38               |
| 746.66         | 192.09      | sequence1.AQETSGEEIS[Pho]KFYLPNC[CAM]NK.+3b6+3.light       | 38               |
| 746.66         | 315.81      | sequence1.AQETSGEEIS[Pho]KFYLPNC[CAM]NK.+3b9+3.light       | 38               |
| 746.66         | 463.20      | sequence1.AQETSGEEIS[Pho]KFYLPNC[CAM]NK.+3b12+3.light      | 38               |
| 746.66         | 625.61      | sequence1.AQETSGEEIS[Pho]KFYLPNC[CAM]NK.+3b16+3.light      | 38               |
| 746.66         | 575.26      | sequence1.AQETS[Pho]GEEISKFYLPNC[CAM]NK.+3y5.light         | 38               |
| 746.66         | 261.16      | sequence1.AQETS[Pho]GEEISKFYLPNC[CAM]NK.+3y2.light         | 38               |
| 746.66         | 904.90      | sequence1.AQETS[Pho]GEEISKFYLPNC[CAM]NK.+3y15+2.light      | 38               |
| 746.66         | 821.40      | sequence1.AQETS[Pho]GEEISKFYLPNC[CAM]NK.+3y14+2.light      | 38               |
| 746.66         | 426.21      | sequence1.AQETS[Pho]GEEISKFYLPNC[CAM]NK.+3y7+2.light       | 38               |
| 746.66         | 547.94      | sequence1.AQETS[Pho]GEEISKFYLPNC[CAM]NK.+3y14+3.light      | 38               |

| <b>Precursor ions</b> | <b>Transitions</b> | <b>Peptide Sequence</b>                                            | <b>Collision Energy</b> |
|-----------------------|--------------------|--------------------------------------------------------------------|-------------------------|
| 746.66                | 376.20             | sequence1.AQETS[Pho]GEEISKFYLPNC[CAM]NK.+3y9+3.light               | 38                      |
| 746.66                | 230.12             | sequence1.AQETS[Pho]GEEISKFYLPNC[CAM]NK.+3y6+3.light               | 38                      |
| 746.66                | 200.10             | sequence1.AQETS[Pho]GEEISKFYLPNC[CAM]NK.+3b2.light                 | 38                      |
| 746.66                | 329.15             | sequence1.AQETS[Pho]GEEISKFYLPNC[CAM]NK.+3b3.light                 | 38                      |
| 746.66                | 215.60             | sequence1.AQETS[Pho]GEEISKFYLPNC[CAM]NK.+3b4+2.light               | 38                      |
| 746.66                | 694.29             | sequence1.AQETS[Pho]GEEISKFYLPNC[CAM]NK.+3b12+2.light              | 38                      |
| 746.66                | 1046.44            | sequence1.AQETS[Pho]GEEISKFYLPNC[CAM]NK.+3b18+2.light              | 38                      |
| 746.66                | 199.74             | sequence1.AQETS[Pho]GEEISKFYLPNC[CAM]NK.+3b5+3.light               | 38                      |
| 746.66                | 218.74             | sequence1.AQETS[Pho]GEEISKFYLPNC[CAM]NK.+3b6+3.light               | 38                      |
| 746.66                | 342.47             | sequence1.AQETS[Pho]GEEISKFYLPNC[CAM]NK.+3b9+3.light               | 38                      |
| 746.66                | 463.20             | sequence1.AQETS[Pho]GEEISKFYLPNC[CAM]NK.+3b12+3.light              | 38                      |
| 746.66                | 625.61             | sequence1.AQETS[Pho]GEEISKFYLPNC[CAM]NK.+3b16+3.light              | 38                      |
| 720.01                | 575.26             | sequence1.AQETSGEEISKFYLPNC[CAM]NK.+3y5.light                      | 37                      |
| 720.01                | 261.16             | sequence1.AQETSGEEISKFYLPNC[CAM]NK.+3y2.light                      | 37                      |
| 720.01                | 864.92             | sequence1.AQETSGEEISKFYLPNC[CAM]NK.+3y15+2.light                   | 37                      |
| 720.01                | 821.40             | sequence1.AQETSGEEISKFYLPNC[CAM]NK.+3y14+2.light                   | 37                      |
| 720.01                | 426.21             | sequence1.AQETSGEEISKFYLPNC[CAM]NK.+3y7+2.light                    | 37                      |
| 720.01                | 547.94             | sequence1.AQETSGEEISKFYLPNC[CAM]NK.+3y14+3.light                   | 37                      |
| 720.01                | 376.20             | sequence1.AQETSGEEISKFYLPNC[CAM]NK.+3y9+3.light                    | 37                      |
| 720.01                | 230.12             | sequence1.AQETSGEEISKFYLPNC[CAM]NK.+3y6+3.light                    | 37                      |
| 720.01                | 200.10             | sequence1.AQETSGEEISKFYLPNC[CAM]NK.+3b2.light                      | 37                      |
| 720.01                | 329.15             | sequence1.AQETSGEEISKFYLPNC[CAM]NK.+3b3.light                      | 37                      |
| 720.01                | 215.60             | sequence1.AQETSGEEISKFYLPNC[CAM]NK.+3b4+2.light                    | 37                      |
| 720.01                | 654.31             | sequence1.AQETSGEEISKFYLPNC[CAM]NK.+3b12+2.light                   | 37                      |
| 720.01                | 1006.46            | sequence1.AQETSGEEISKFYLPNC[CAM]NK.+3b18+2.light                   | 37                      |
| 720.01                | 173.08             | sequence1.AQETSGEEISKFYLPNC[CAM]NK.+3b5+3.light                    | 37                      |
| 720.01                | 192.09             | sequence1.AQETSGEEISKFYLPNC[CAM]NK.+3b6+3.light                    | 37                      |
| 720.01                | 315.81             | sequence1.AQETSGEEISKFYLPNC[CAM]NK.+3b9+3.light                    | 37                      |
| 720.01                | 436.54             | sequence1.AQETSGEEISKFYLPNC[CAM]NK.+3b12+3.light                   | 37                      |
| 720.01                | 598.96             | sequence1.AQETSGEEISKFYLPNC[CAM]NK.+3b16+3.light                   | 37                      |
| 976.40                | 1076.54            | sequence1.DASAPHA AEAGSPES[Pho]PES[Pho]TEITEEELL.+3y9.light        | 51                      |
| 976.40                | 975.49             | sequence1.DASAPHA AEAGSPES[Pho]PES[Pho]TEITEEELL.+3y8.light        | 51                      |
| 976.40                | 503.27             | sequence1.DASAPHA AEAGSPES[Pho]PES[Pho]TEITEEELL.+3y4.light        | 51                      |
| 976.40                | 245.19             | sequence1.DASAPHA AEAGSPES[Pho]PES[Pho]TEITEEELL.+3y2.light        | 51                      |
| 976.40                | 1292.02            | sequence1.DASAPHA AEAGSPES[Pho]PES[Pho]TEITEEELL.+3y23+2.1<br>ight | 51                      |
| 976.40                | 1103.93            | sequence1.DASAPHA AEAGSPES[Pho]PES[Pho]TEITEEELL.+3y19+2.1<br>ight | 51                      |
| 976.40                | 1003.89            | sequence1.DASAPHA AEAGSPES[Pho]PES[Pho]TEITEEELL.+3y17+2.1<br>ight | 51                      |
| 976.40                | 931.87             | sequence1.DASAPHA AEAGSPES[Pho]PES[Pho]TEITEEELL.+3y15+2.1<br>ight | 51                      |
| 976.40                | 883.34             | sequence1.DASAPHA AEAGSPES[Pho]PES[Pho]TEITEEELL.+3y14+2.1<br>ight | 51                      |
| 976.40                | 735.32             | sequence1.DASAPHA AEAGSPES[Pho]PES[Pho]TEITEEELL.+3y12+2.1<br>ight | 51                      |
| 976.40                | 488.25             | sequence1.DASAPHA AEAGSPES[Pho]PES[Pho]TEITEEELL.+3y8+2.li<br>ght  | 51                      |
| 976.40                | 621.58             | sequence1.DASAPHA AEAGSPES[Pho]PES[Pho]TEITEEELL.+3y15+3.1<br>ight | 51                      |
| 976.40                | 458.20             | sequence1.DASAPHA AEAGSPES[Pho]PES[Pho]TEITEEELL.+3y11+3.1<br>ight | 51                      |

| Precursor ions | Transitions | Peptide Sequence                                                    | Collision Energy |
|----------------|-------------|---------------------------------------------------------------------|------------------|
| 976.40         | 978.43      | sequence1.DASAPHA AEAGSPES[Pho]PES[Pho]TEIT EEELL.+3b11.lig<br>ht   | 51               |
| 976.40         | 1458.55     | sequence1.DASAPHA AEAGSPES[Pho]PES[Pho]TEIT EEELL.+3b15.lig<br>ht   | 51               |
| 976.40         | 173.07      | sequence1.DASAPHA AEAGSPES[Pho]PES[Pho]TEIT EEELL.+3b4+2.li<br>ght  | 51               |
| 976.40         | 1097.91     | sequence1.DASAPHA AEAGSPES[Pho]PES[Pho]TEIT EEELL.+3b21+2.l<br>ight | 51               |
| 976.40         | 388.18      | sequence1.DASAPHA AEAGSPES[Pho]PES[Pho]TEIT EEELL.+3b13+3.l<br>ight | 51               |
| 976.40         | 562.22      | sequence1.DASAPHA AEAGSPES[Pho]PES[Pho]TEIT EEELL.+3b17+3.l<br>ight | 51               |
| 949.74         | 1076.54     | sequence1.DASAPHA AEAGSPESPE[Pho]TEIT EEELL.+3y9.light              | 49               |
| 949.74         | 975.49      | sequence1.DASAPHA AEAGSPESPE[Pho]TEIT EEELL.+3y8.light              | 49               |
| 949.74         | 503.27      | sequence1.DASAPHA AEAGSPESPE[Pho]TEIT EEELL.+3y4.light              | 49               |
| 949.74         | 245.19      | sequence1.DASAPHA AEAGSPESPE[Pho]TEIT EEELL.+3y2.light              | 49               |
| 949.74         | 1252.04     | sequence1.DASAPHA AEAGSPESPE[Pho]TEIT EEELL.+3y23+2.light           | 49               |
| 949.74         | 1063.95     | sequence1.DASAPHA AEAGSPESPE[Pho]TEIT EEELL.+3y19+2.light           | 49               |
| 949.74         | 963.91      | sequence1.DASAPHA AEAGSPESPE[Pho]TEIT EEELL.+3y17+2.light           | 49               |
| 949.74         | 891.88      | sequence1.DASAPHA AEAGSPESPE[Pho]TEIT EEELL.+3y15+2.light           | 49               |
| 949.74         | 843.36      | sequence1.DASAPHA AEAGSPESPE[Pho]TEIT EEELL.+3y14+2.light           | 49               |
| 949.74         | 735.32      | sequence1.DASAPHA AEAGSPESPE[Pho]TEIT EEELL.+3y12+2.light           | 49               |
| 949.74         | 488.25      | sequence1.DASAPHA AEAGSPESPE[Pho]TEIT EEELL.+3y8+2.light            | 49               |
| 949.74         | 594.92      | sequence1.DASAPHA AEAGSPESPE[Pho]TEIT EEELL.+3y15+3.light           | 49               |
| 949.74         | 458.20      | sequence1.DASAPHA AEAGSPESPE[Pho]TEIT EEELL.+3y11+3.light           | 49               |
| 949.74         | 978.43      | sequence1.DASAPHA AEAGSPESPE[Pho]TEIT EEELL.+3b11.light             | 49               |
| 949.74         | 1378.59     | sequence1.DASAPHA AEAGSPESPE[Pho]TEIT EEELL.+3b15.light             | 49               |
| 949.74         | 173.07      | sequence1.DASAPHA AEAGSPESPE[Pho]TEIT EEELL.+3b4+2.light            | 49               |
| 949.74         | 1057.93     | sequence1.DASAPHA AEAGSPESPE[Pho]TEIT EEELL.+3b21+2.light           | 49               |
| 949.74         | 388.18      | sequence1.DASAPHA AEAGSPESPE[Pho]TEIT EEELL.+3b13+3.light           | 49               |
| 949.74         | 535.57      | sequence1.DASAPHA AEAGSPESPE[Pho]TEIT EEELL.+3b17+3.light           | 49               |
| 923.09         | 1076.54     | sequence1.DASAPHA AEAGSPESPESTEIT EEELL.+3y9.light                  | 48               |
| 923.09         | 975.49      | sequence1.DASAPHA AEAGSPESPESTEIT EEELL.+3y8.light                  | 48               |
| 923.09         | 503.27      | sequence1.DASAPHA AEAGSPESPESTEIT EEELL.+3y4.light                  | 48               |
| 923.09         | 245.19      | sequence1.DASAPHA AEAGSPESPESTEIT EEELL.+3y2.light                  | 48               |
| 923.09         | 1212.06     | sequence1.DASAPHA AEAGSPESPESTEIT EEELL.+3y23+2.light               | 48               |
| 923.09         | 1023.97     | sequence1.DASAPHA AEAGSPESPESTEIT EEELL.+3y19+2.light               | 48               |
| 923.09         | 923.93      | sequence1.DASAPHA AEAGSPESPESTEIT EEELL.+3y17+2.light               | 48               |
| 923.09         | 851.90      | sequence1.DASAPHA AEAGSPESPESTEIT EEELL.+3y15+2.light               | 48               |
| 923.09         | 803.37      | sequence1.DASAPHA AEAGSPESPESTEIT EEELL.+3y14+2.light               | 48               |
| 923.09         | 695.34      | sequence1.DASAPHA AEAGSPESPESTEIT EEELL.+3y12+2.light               | 48               |
| 923.09         | 488.25      | sequence1.DASAPHA AEAGSPESPESTEIT EEELL.+3y8+2.light                | 48               |
| 923.09         | 568.27      | sequence1.DASAPHA AEAGSPESPESTEIT EEELL.+3y15+3.light               | 48               |
| 923.09         | 431.54      | sequence1.DASAPHA AEAGSPESPESTEIT EEELL.+3y11+3.light               | 48               |
| 923.09         | 978.43      | sequence1.DASAPHA AEAGSPESPESTEIT EEELL.+3b11.light                 | 48               |
| 923.09         | 1378.59     | sequence1.DASAPHA AEAGSPESPESTEIT EEELL.+3b15.light                 | 48               |
| 923.09         | 173.07      | sequence1.DASAPHA AEAGSPESPESTEIT EEELL.+3b4+2.light                | 48               |
| 923.09         | 1017.95     | sequence1.DASAPHA AEAGSPESPESTEIT EEELL.+3b21+2.light               | 48               |
| 923.09         | 388.18      | sequence1.DASAPHA AEAGSPESPESTEIT EEELL.+3b13+3.light               | 48               |
| 923.09         | 535.57      | sequence1.DASAPHA AEAGSPESPESTEIT EEELL.+3b17+3.light               | 48               |

| <b>Precursor ions</b> | <b>Transitions</b> | <b>Peptide Sequence</b>                 | <b>Collision Energy</b> |
|-----------------------|--------------------|-----------------------------------------|-------------------------|
| 685.26                | 541.15             | sequence1.DNFHLMAPS[Pho]EE.+2y4.light   | 34                      |
| 685.26                | 428.66             | sequence1.DNFHLMAPS[Pho]EE.+2y7+2.light | 34                      |
| 685.26                | 372.12             | sequence1.DNFHLMAPS[Pho]EE.+2y6+2.light | 34                      |
| 685.26                | 306.60             | sequence1.DNFHLMAPS[Pho]EE.+2y5+2.light | 34                      |
| 685.26                | 230.08             | sequence1.DNFHLMAPS[Pho]EE.+2b2.light   | 34                      |
| 685.26                | 377.15             | sequence1.DNFHLMAPS[Pho]EE.+2b3.light   | 34                      |
| 685.26                | 829.37             | sequence1.DNFHLMAPS[Pho]EE.+2b7.light   | 34                      |
| 685.26                | 463.71             | sequence1.DNFHLMAPS[Pho]EE.+2b8+2.light | 34                      |
| 685.26                | 547.21             | sequence1.DNFHLMAPS[Pho]EE.+2b9+2.light | 34                      |
| 645.28                | 461.19             | sequence1.DNFHLMAPSEE.+2y4.light        | 32                      |
| 645.28                | 388.68             | sequence1.DNFHLMAPSEE.+2y7+2.light      | 32                      |
| 645.28                | 332.14             | sequence1.DNFHLMAPSEE.+2y6+2.light      | 32                      |
| 645.28                | 266.62             | sequence1.DNFHLMAPSEE.+2y5+2.light      | 32                      |
| 645.28                | 230.08             | sequence1.DNFHLMAPSEE.+2b2.light        | 32                      |
| 645.28                | 377.15             | sequence1.DNFHLMAPSEE.+2b3.light        | 32                      |
| 645.28                | 829.37             | sequence1.DNFHLMAPSEE.+2b7.light        | 32                      |
| 645.28                | 463.71             | sequence1.DNFHLMAPSEE.+2b8+2.light      | 32                      |
| 645.28                | 507.23             | sequence1.DNFHLMAPSEE.+2b9+2.light      | 32                      |

**Table S3. IGFBP-1 phosphopeptide peak intensity using MRM MS analysis of cell media from rapamycin and hypoxia treated HepG2 cells**

| <b>Precursor ion</b> | <b>PeptideSequence</b>                 | <b>Peak Intensity (Control)</b> | <b>Peak Intensity (Rapa)</b> | <b>Peak Intensity (Hypoxia)</b> | <b>Peak Intensity (Rapa + Hypoxia)</b> |
|----------------------|----------------------------------------|---------------------------------|------------------------------|---------------------------------|----------------------------------------|
| 765.92               | ALPGEQQLHALTR                          | 12578                           | 23741                        | 5416                            | 4880                                   |
| 773.32               | AQETS[Pho]GEEIS[Pho]KFYLPNC[CAM]NK     | 8470                            | 24962                        | 24273                           | 6555                                   |
| 746.66               | AQETS[Pho]GEEISKFYLPNC[CAM]NK          | 7729                            | 33732                        | 7819                            | 10280                                  |
| 720.01               | AQETSGEEISKFYLPNC[CAM]NK               | 8123                            | 13649                        | 7463                            | 5193                                   |
| 976.40               | DASAPHA AEAGSPES[Pho]PES[Pho]TEITEEELL | 19386                           | 9227                         | 13799                           | 11543                                  |
| 949.74               | DASAPHA AEAGSPESPES[Pho]TEITEEELL      | 16342                           | 7260                         | 11088                           | 17250                                  |
| 923.09               | DASAPHA AEAGSPESPESTEITEEELL           | 6458                            | 1513                         | 3245                            | 2875                                   |
| 685.26               | DNFHLMAPS[Pho]EE                       | 19386                           | 9227                         | 13799                           | 11543                                  |
| 645.28               | DNFHLMAPSEE                            | 8764                            | 1624                         | 1589                            | 1657                                   |

**Table S4. IGFBP-1 phosphopeptide peak intensity using MRM MS analysis of cell media from HepG2 cells treated for mTORC1 + C2 activation by DEPTOR silencing**

| <b>Precursor ion</b> | <b>PeptideSequence</b>             | <b>Peak Intensity (Scrambled siRNA)</b> | <b>Peak Intensity (DEPTOR siRNA)</b> | <b>Peak Intensity (DEPTOR siRNA + Hypoxia)</b> |
|----------------------|------------------------------------|-----------------------------------------|--------------------------------------|------------------------------------------------|
| 773.32               | AQETS[Pho]GEEIS[Pho]KFYLPNC[CAM]NK | 8215                                    | 704                                  | 578                                            |
| 746.66               | AQETS[Pho]GEEISKFYLPNC[CAM]NK      | 740                                     | 211                                  | 234                                            |
| 746.66               | AQETSGEEIS[Pho]KFYLPNC[CAM]NK      | 881                                     | 193                                  | 251                                            |
| 720.01               | AQETSGEEISKFYLPNC[CAM]NK           | 9526                                    | 7548                                 | 4898                                           |

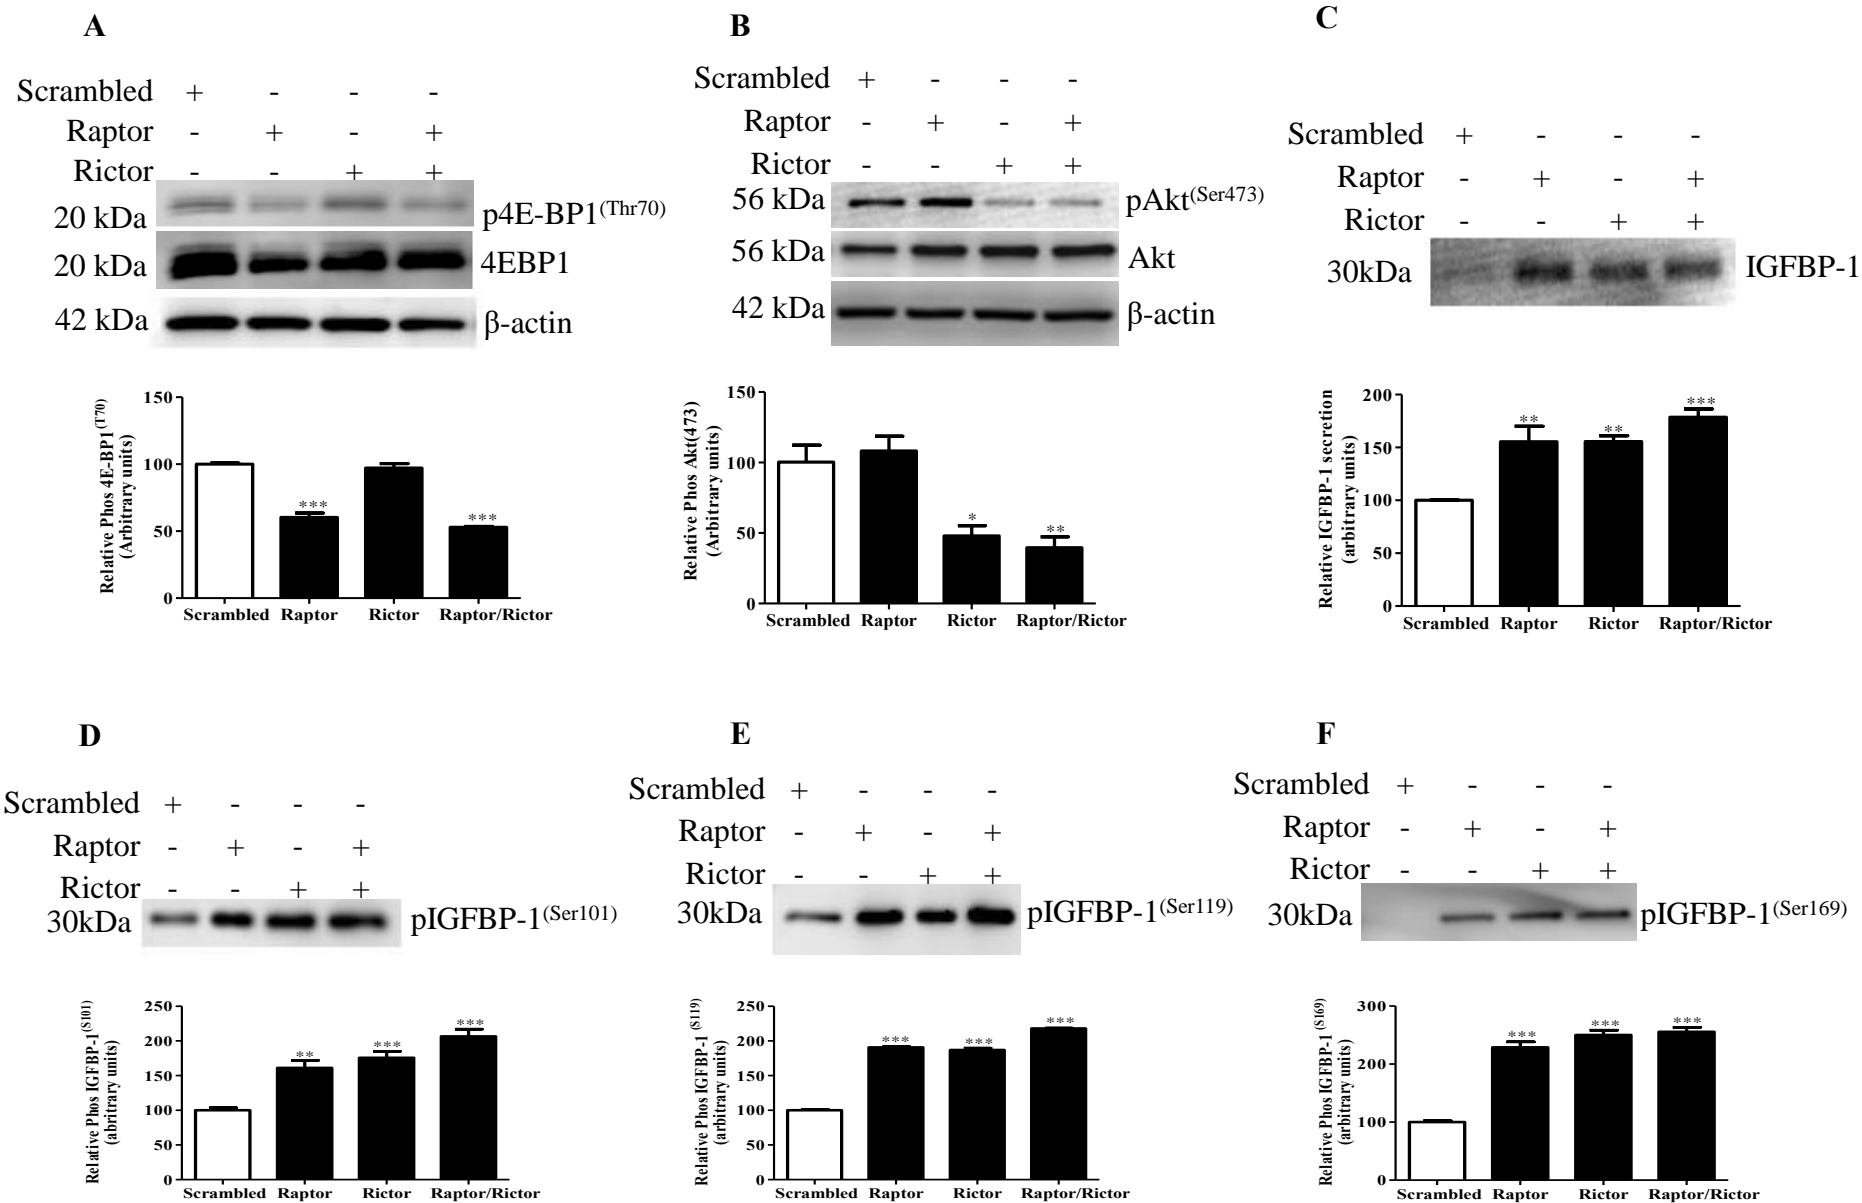

Figure S1 (A-F)



**A**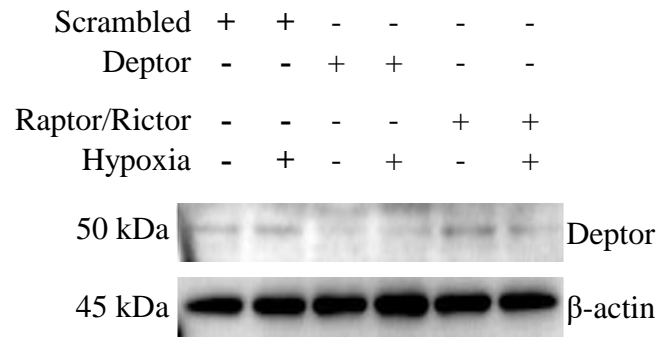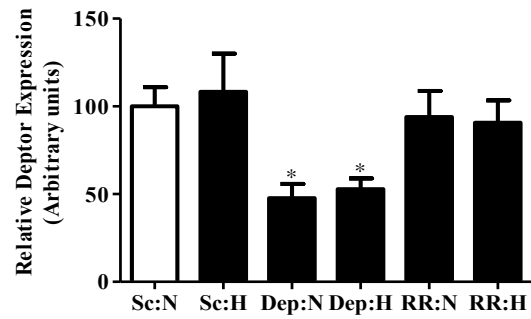**B**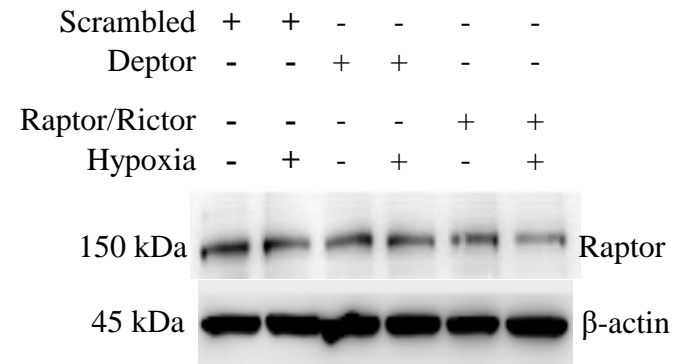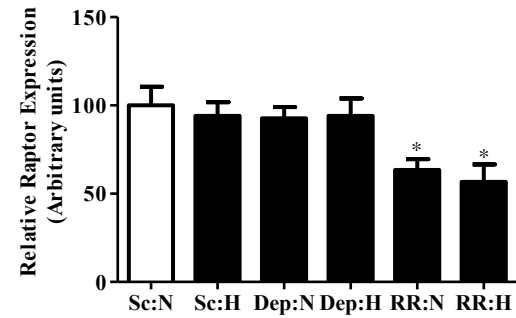**Figure S2 (A-B)**

C

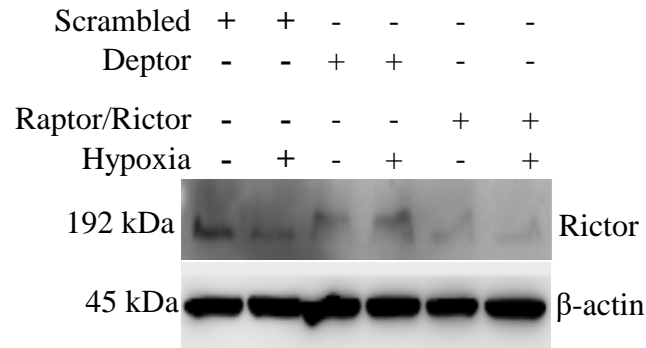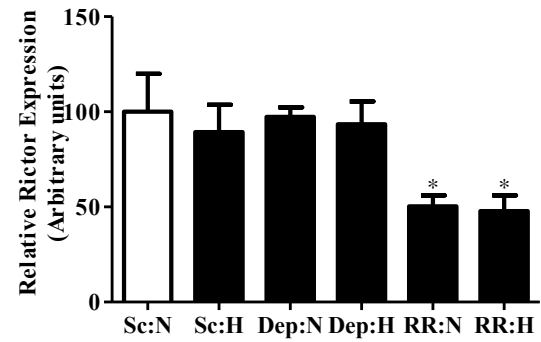

Figure S2 (C)

**A**

|           |   |   |   |   |   |   |   |   |
|-----------|---|---|---|---|---|---|---|---|
| Scrambled | + | + | - | - | - | - | - | - |
| TSC2      | - | - | + | + | - | - | - | - |
| Raptor    | - | - | - | - | + | + | - | - |
| Rictor    | - | - | - | - | - | - | + | + |
| Hypoxia   | - | + | - | + | - | + | - | + |

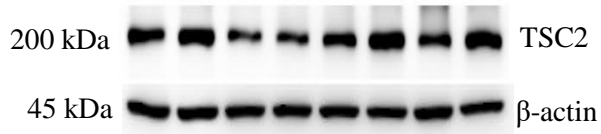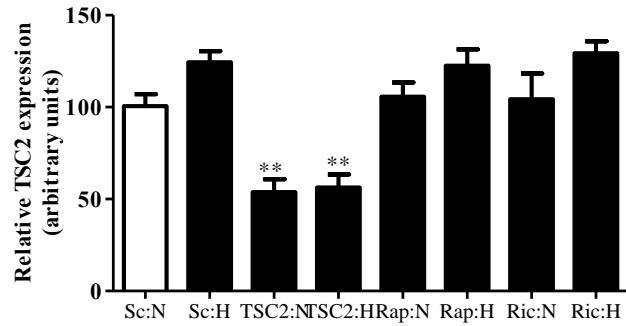**B**

|           |   |   |   |   |   |   |   |   |
|-----------|---|---|---|---|---|---|---|---|
| Scrambled | + | + | - | - | - | - | - | - |
| TSC2      | - | - | + | + | - | - | - | - |
| Raptor    | - | - | - | - | + | + | - | - |
| Rictor    | - | - | - | - | - | - | + | + |
| Hypoxia   | - | + | - | + | - | + | - | + |

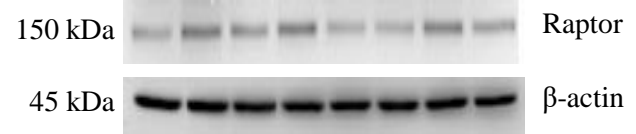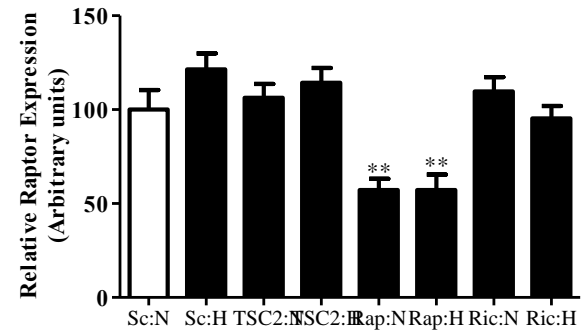**Figure S3 (A-B)**

C

|           |   |   |   |   |   |   |   |   |
|-----------|---|---|---|---|---|---|---|---|
| Scrambled | + | + | - | - | - | - | - | - |
| TSC2      | - | - | + | + | - | - | - | - |
| Raptor    | - | - | - | - | + | + | - | - |
| Rictor    | - | - | - | - | - | - | + | + |
| Hypoxia   | - | + | - | + | - | + | - | + |

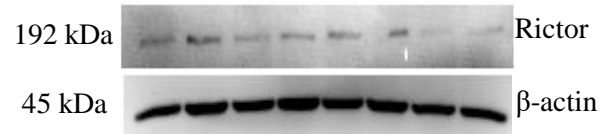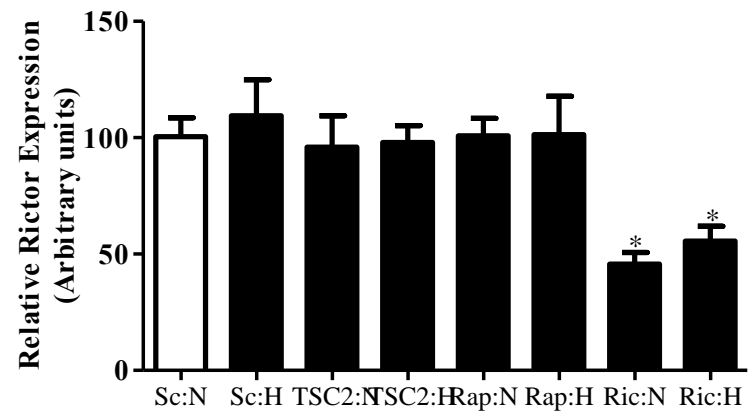

Figure S3 (C)

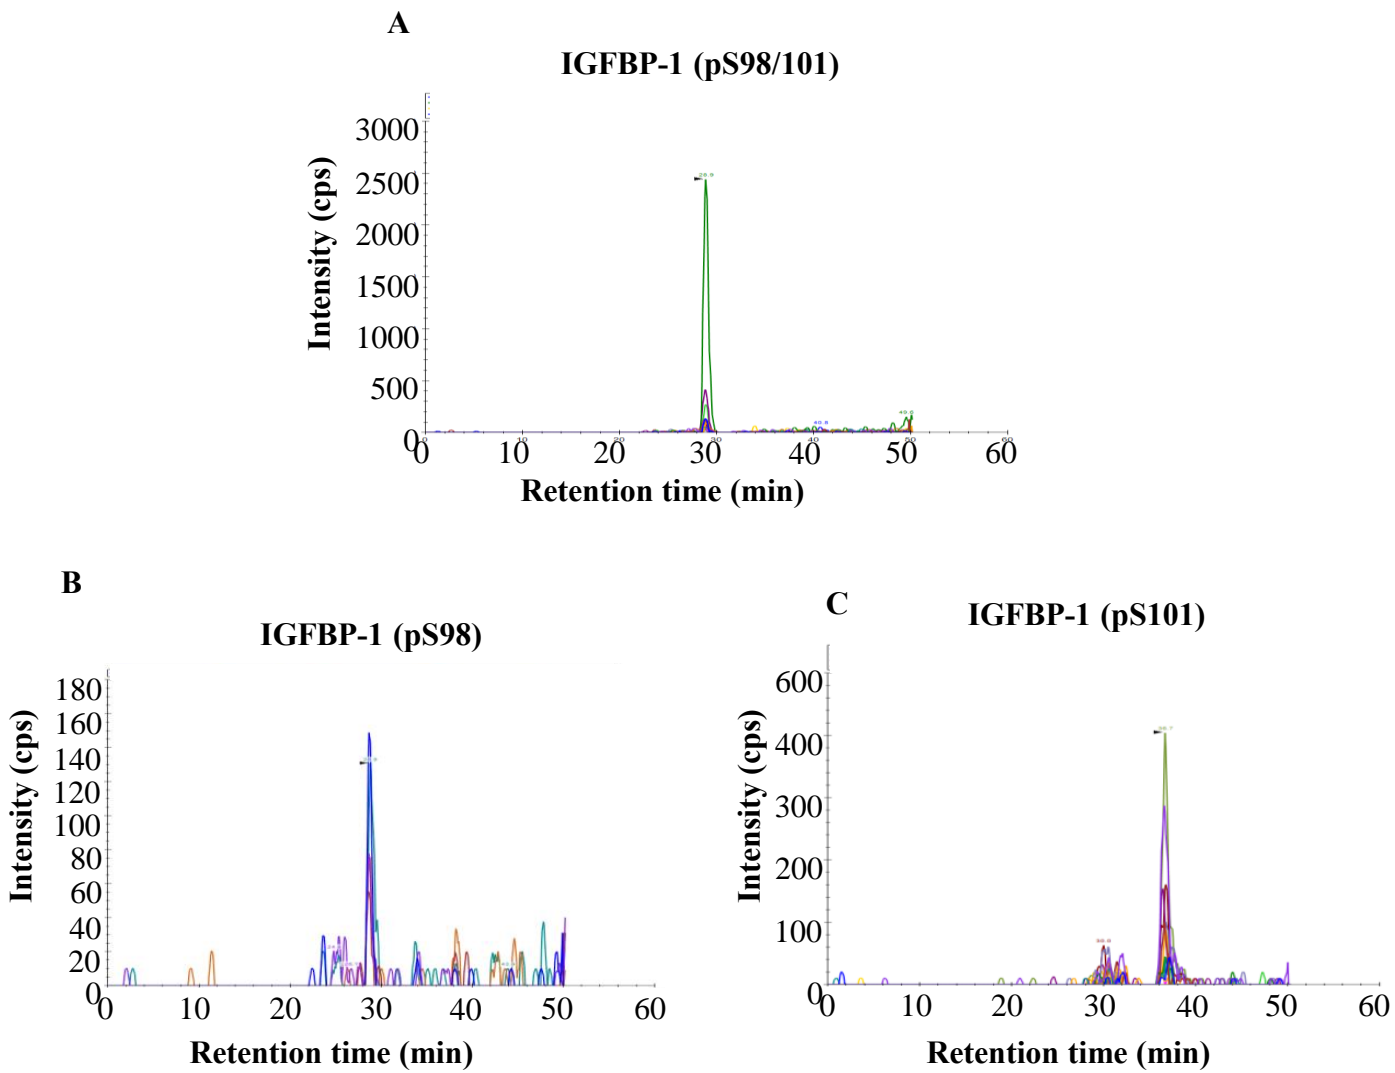

**Figure S4 (A-C)**

**D**

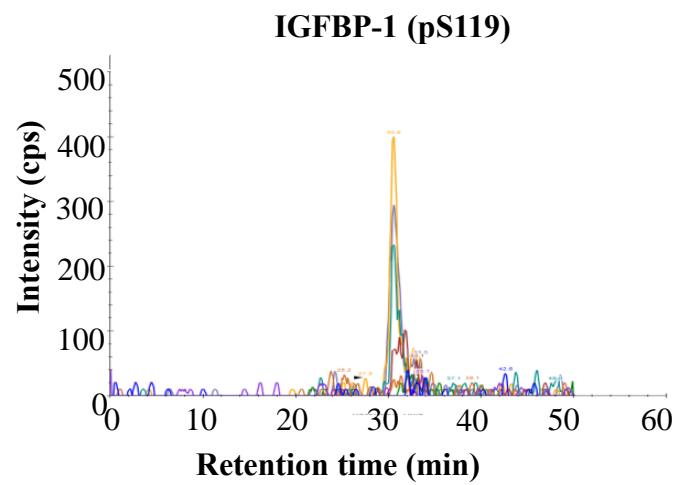

**Figure S4 (D)**

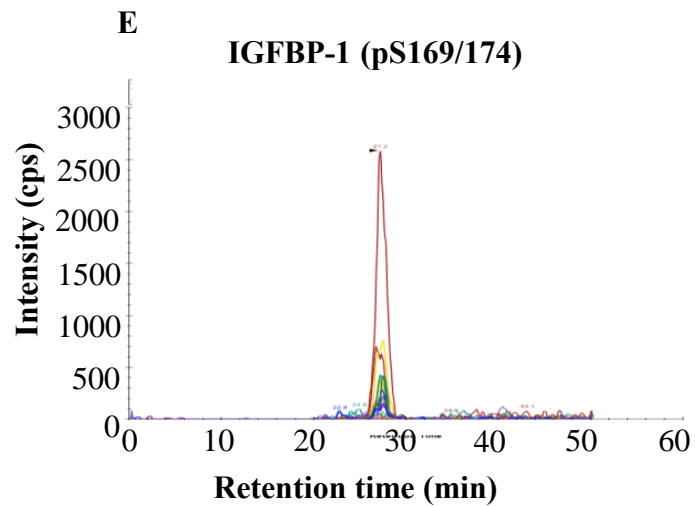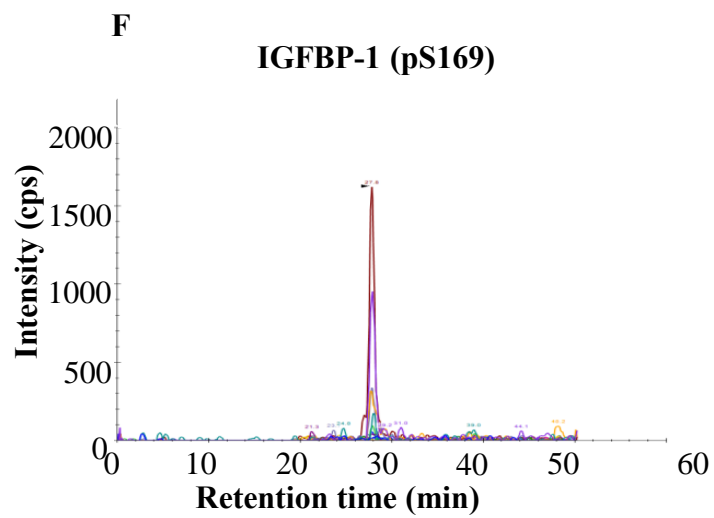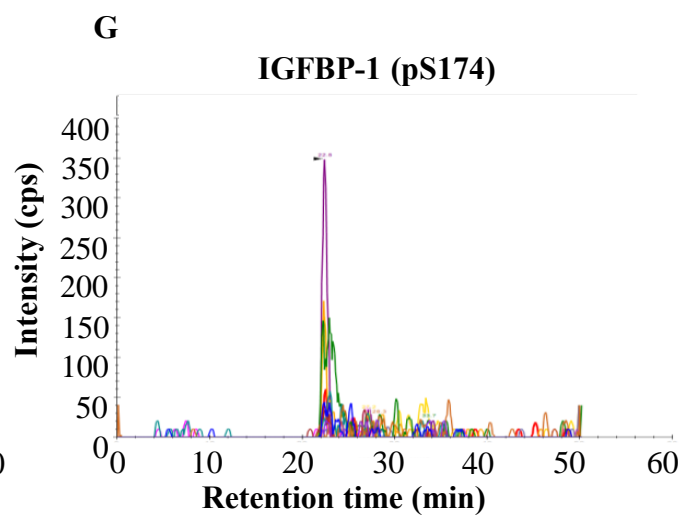

**Figure S4 (E-G)**

**H Standard IGFBP-1 internal peptide**

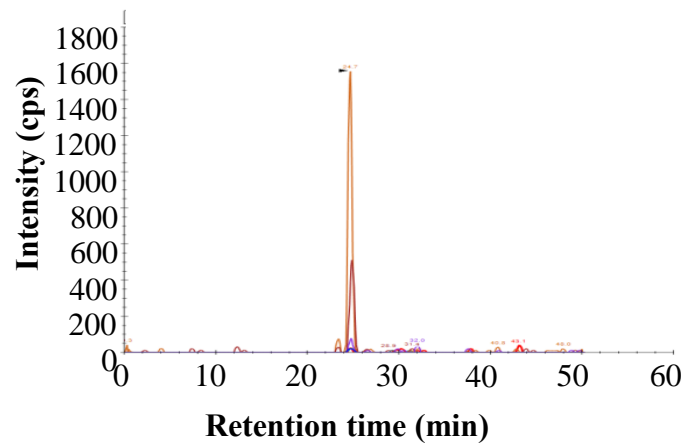

**Figure S4 (H)**



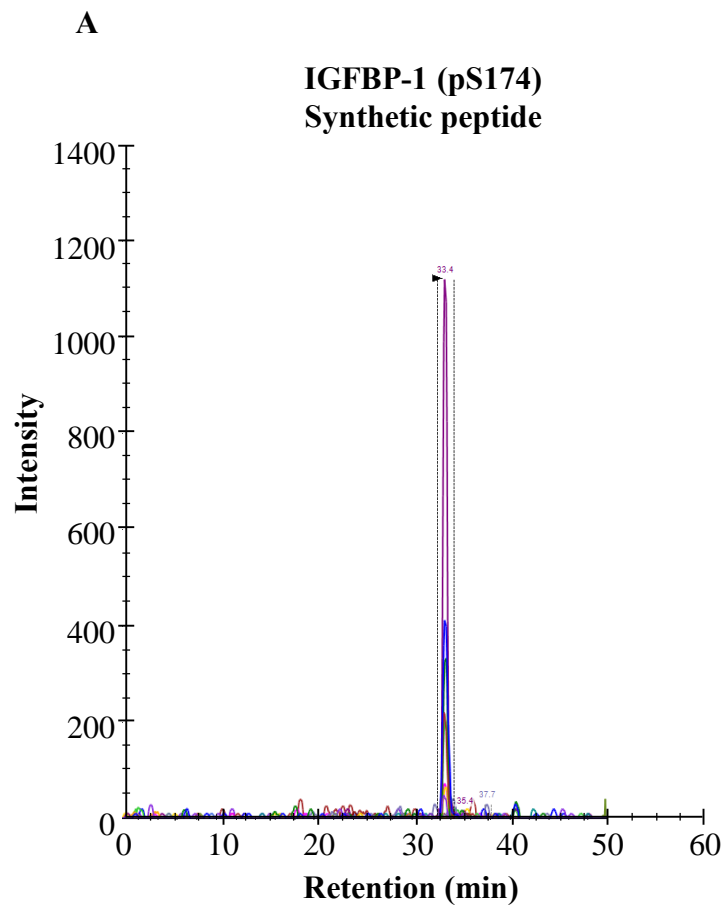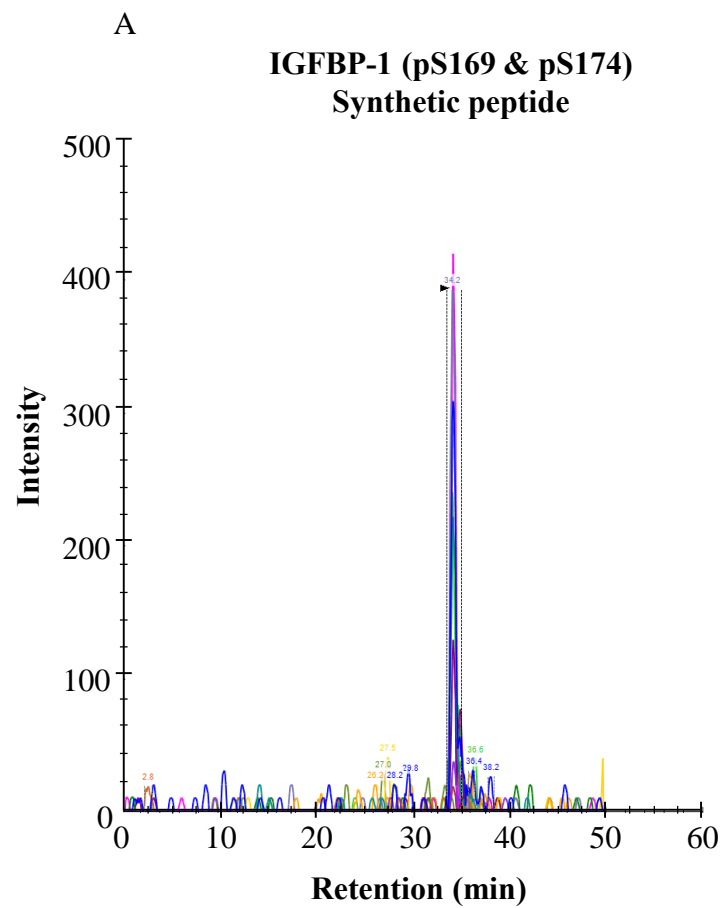

**Figure S5 (A-B)**

**Supplemental Figure 1. The effect of raptor and rictor silencing on IGFBP-1 secretion and phosphorylation**

Representative western blot of A. mTORC1 readout 4E-BP1 (Thr70) and B. mTORC2 readout Akt (Ser473) phosphorylation in HepG2 cell lysates. Raptor and raptor+rictor silencing inhibited 4E-BP1 phosphorylation while rictor and raptor+rictor silencing both inhibited Akt phosphorylation to similar degrees. Western blot using equal aliquots of cell media of scrambled, raptor, rictor, and combined raptor+rictor siRNA treated HepG2 cells. Raptor, rictor, and combined raptor+rictor siRNA all significantly increased. C. IGFBP-1 secretion and D-F. IGFBP-1 phosphorylation at Ser101, Ser119 and Ser169, suggesting that inhibition of either complex is sufficient to induce IGFBP-1 secretion and phosphorylation. Values are displayed as mean  $\pm$  SEM. \* $p < 0.05$ , \*\* $p = 0.001-0.05$ , \*\*\* $p < 0.0001$ ;

**Supplemental Figure 2. Validation of DEPTOR, raptor, and rictor siRNA on respective protein expression levels under hypoxia**

Representative western blots of equal concentration of cell lysate protein from HepG2 cells transfected with scramble (normoxia), scramble (hypoxia), DEPTOR (normoxia), DEPTOR (hypoxia), raptor+rictor (normoxia) and raptor+rictor (hypoxia) siRNA. siRNA silencing of A. DEPTOR, B. Raptor and C. Rictor. DEPTOR significantly decreased total DEPTOR protein expression, regardless of hypoxic status. DEPTOR silencing did not affect either raptor or rictor protein expression. Raptor siRNA silencing decreased only raptor protein expression regardless of hypoxic status. Similarly rictor siRNA silencing specifically decreased rictor protein expression regardless of hypoxic status. Values are displayed as mean  $\pm$  SEM. \* $p < 0.05$ , \*\* $p =$

0.001-0.05, \*\*\* $p < 0.0001$ . versus control; One-way analysis of variance; Dunnet's Multiple Comparison Test.

### **Supplemental Figure 3. Validation of TSC2, raptor, and rictor siRNA on respective protein expression levels under hypoxia**

Representative western blots of equal cell lysate protein from HepG2 cells transfected with scramble (normoxia), scramble (hypoxia), TSC2 (normoxia), TSC2 (hypoxia), raptor (normoxia), raptor (hypoxia), rictor (normoxia) and rictor (hypoxia) siRNA. siRNA silencing of **A. TSC2**, **B. Raptor** and **C. Rictor**. TSC2 significantly decreased total TSC2 protein expression regardless of hypoxic status. Raptor siRNA significantly decreased specifically total raptor protein expression, regardless of hypoxic status. Rictor siRNA significantly decreased only rictor protein expression, regardless of hypoxic status. Values are displayed as mean  $\pm$  SEM. \* $p < 0.05$ , \*\* $p = 0.001-0.05$ , \*\*\* $p < 0.0001$ . versus control; One-way analysis of variance; Dunnet's Multiple Comparison Test.

### **Supplemental Figure 4. Representative MRM spectra of identified phosphorylation sites**

Immunoprecipitated IGFBP-1 samples or a standard synthetic IGFBP-1 internal peptide was digested by respective enzymes to generate appropriate peptide fragments. MRM transitions were predicted by Skyline and the transitions **A-H** representing the modification sites on IGFBP-1 singly and in combination were chosen to distinguish from other serine residues.

### **Supplemental Figure 5. MRM spectra of synthetic IGFBP-1 peptides containing the novel Ser174 phosphorylation modification**

Synthetic peptides of the digested fragment of IGFBP-1 containing either **A.** pSer174 or **B.** pSer169+pSer174 phosphorylation. Synthetic peptides were used to validate the transitions used to detect the novel pSer174 phosphorylation site within IGFBP-1.

**Supplemental Table 1 Summary of primary antibodies used with corresponding target protein, manufacturer, species raised in and dilution used**

| Peptide/protein target         | Name of Antibody                                            | Manufacturer, catalog #, and/or name of individual providing the antibody | Species raised in; monoclonal or polyclonal | Dilution used |
|--------------------------------|-------------------------------------------------------------|---------------------------------------------------------------------------|---------------------------------------------|---------------|
| Total IGFBP-1                  | Anti human IGFBP-1 monoclonal 6303                          | Medix Biochemica                                                          | Mouse;<br>Monoclonal                        | 1:10000       |
| Total IGFBP-1                  | Anti human IGFBP-1 polyclonal                               | Dr. Rob C Baxter                                                          | Rabbit;<br>Polyclonal                       | 1:10000       |
| Phospho-IGFBP-1 (S101)         | Phospho-IGFBP-1 (S101)                                      | YenZym                                                                    | Rabbit;<br>Polyclonal                       | 1:1000        |
| Phospho-IGFBP-1 (S119)         | Phospho-IGFBP-1 (S119)                                      | YenZym                                                                    | Rabbit;<br>Polyclonal                       | 1:1000        |
| Phospho-IGFBP-1 (S169)         | Phospho-IGFBP-1 (S169)                                      | YenZym                                                                    | Rabbit;<br>Polyclonal                       | 1:1000        |
| $\beta$ -actin                 | $\beta$ -actin (8H10D10) Mouse mAb                          | Cell signaling, #3700                                                     | Mouse;<br>Monoclonal                        | 1:3000        |
| Phospho-4EBP-1 (T70)           | Phospho-4E-BP1 (Thr70) Antibody                             | Cell signaling, #9455                                                     | Rabbit;<br>Polyclonal                       | 1:1000        |
| Total 4EBP-1                   | 4EBP-1 Antibody                                             | Cell signaling, #9452                                                     | Rabbit;<br>Polyclonal                       | 1:1000        |
| Phospho-Akt (S473)             | Phospho-Akt (Ser473) (D9E) XP® Rabbit mAb                   | Cell signaling, #4060                                                     | Rabbit;<br>Monoclonal                       | 1:1000        |
| Total Akt                      | Akt Antibody                                                | Cell signaling, #9272                                                     | Rabbit;<br>Polyclonal                       | 1:1000        |
| Phospho-IGF-1R $\beta$ (Y1135) | Phospho-IGF-1 Receptor $\beta$ (Tyr1135) (DA7A8) Rabbit mAb | Cell signaling, #3918                                                     | Rabbit;<br>Monoclonal                       | 1:1000        |
| Total IGF-1R $\beta$           | IGF-1R $\beta$ (C-20)                                       | Santa Cruz Biotechnology, sc-713                                          | Rabbit;<br>Polyclonal                       | 1:1000        |
| Raptor                         | Raptor (24C12) Rabbit mAb                                   | Cell signaling, #2280                                                     | Rabbit;<br>Monoclonal                       | 1:1000        |
| Rictor                         | Rictor (53A2) Rabbit mAb                                    | Cell signaling, #2114                                                     | Rabbit;<br>Monoclonal                       | 1:1000        |
| TSC2                           | Tuberin/TSC2 (D93F12) Rabbit mAb                            | Cell signalling, #4308                                                    | Rabbit;<br>Monoclonal                       | 1:1000        |
| DEPTOR                         | DEPTOR/DEPDC6 (D9F5) Rabbit mAb                             | Cell signalling, #11816                                                   | Rabbit;<br>Monoclonal                       | 1:1000        |

**Supplemental Table 2. Dataset for MRM transitions used to detect IGF1P-1 phosphorylated peptides**

| Precursor ions | Transitions | Peptide Sequence                                           | Collision Energy |
|----------------|-------------|------------------------------------------------------------|------------------|
| 765.92         | 1346.72     | sequence1.ALPGEQQPLHALTR.+2y12.light                       | 36               |
| 765.92         | 807.48      | sequence1.ALPGEQQPLHALTR.+2y7.light                        | 36               |
| 765.92         | 673.86      | sequence1.ALPGEQQPLHALTR.+2y12+2.light                     | 36               |
| 765.92         | 404.25      | sequence1.ALPGEQQPLHALTR.+2y7+2.light                      | 36               |
| 765.92         | 724.36      | sequence1.ALPGEQQPLHALTR.+2b7.light                        | 36               |
| 765.92         | 1071.56     | sequence1.ALPGEQQPLHALTR.+2b10.light                       | 36               |
| 773.32         | 575.26      | sequence1.AQETS[Pho]GEEIS[Pho]KFYLPNC[CAM]NK.+3y5.light    | 40               |
| 773.32         | 261.16      | sequence1.AQETS[Pho]GEEIS[Pho]KFYLPNC[CAM]NK.+3y2.light    | 40               |
| 773.32         | 944.88      | sequence1.AQETS[Pho]GEEIS[Pho]KFYLPNC[CAM]NK.+3y15+2.light | 40               |
| 773.32         | 861.38      | sequence1.AQETS[Pho]GEEIS[Pho]KFYLPNC[CAM]NK.+3y14+2.light | 40               |
| 773.32         | 426.21      | sequence1.AQETS[Pho]GEEIS[Pho]KFYLPNC[CAM]NK.+3y7+2.light  | 40               |
| 773.32         | 574.59      | sequence1.AQETS[Pho]GEEIS[Pho]KFYLPNC[CAM]NK.+3y14+3.light | 40               |
| 773.32         | 376.20      | sequence1.AQETS[Pho]GEEIS[Pho]KFYLPNC[CAM]NK.+3y9+3.light  | 40               |
| 773.32         | 230.12      | sequence1.AQETS[Pho]GEEIS[Pho]KFYLPNC[CAM]NK.+3y6+3.light  | 40               |
| 773.32         | 200.10      | sequence1.AQETS[Pho]GEEIS[Pho]KFYLPNC[CAM]NK.+3b2.light    | 40               |
| 773.32         | 329.15      | sequence1.AQETS[Pho]GEEIS[Pho]KFYLPNC[CAM]NK.+3b3.light    | 40               |
| 773.32         | 215.60      | sequence1.AQETS[Pho]GEEIS[Pho]KFYLPNC[CAM]NK.+3b4+2.light  | 40               |
| 773.32         | 734.28      | sequence1.AQETS[Pho]GEEIS[Pho]KFYLPNC[CAM]NK.+3b12+2.light | 40               |
| 773.32         | 1086.42     | sequence1.AQETS[Pho]GEEIS[Pho]KFYLPNC[CAM]NK.+3b18+2.light | 40               |
| 773.32         | 199.74      | sequence1.AQETS[Pho]GEEIS[Pho]KFYLPNC[CAM]NK.+3b5+3.light  | 40               |
| 773.32         | 218.74      | sequence1.AQETS[Pho]GEEIS[Pho]KFYLPNC[CAM]NK.+3b6+3.light  | 40               |
| 773.32         | 342.47      | sequence1.AQETS[Pho]GEEIS[Pho]KFYLPNC[CAM]NK.+3b9+3.light  | 40               |
| 773.32         | 489.85      | sequence1.AQETS[Pho]GEEIS[Pho]KFYLPNC[CAM]NK.+3b12+3.light | 40               |
| 773.32         | 652.27      | sequence1.AQETS[Pho]GEEIS[Pho]KFYLPNC[CAM]NK.+3b16+3.light | 40               |
| 746.66         | 575.26      | sequence1.AQETSGEEIS[Pho]KFYLPNC[CAM]NK.+3y5.light         | 38               |
| 746.66         | 261.16      | sequence1.AQETSGEEIS[Pho]KFYLPNC[CAM]NK.+3y2.light         | 38               |
| 746.66         | 904.90      | sequence1.AQETSGEEIS[Pho]KFYLPNC[CAM]NK.+3y15+2.light      | 38               |
| 746.66         | 861.38      | sequence1.AQETSGEEIS[Pho]KFYLPNC[CAM]NK.+3y14+2.light      | 38               |
| 746.66         | 426.21      | sequence1.AQETSGEEIS[Pho]KFYLPNC[CAM]NK.+3y7+2.light       | 38               |
| 746.66         | 574.59      | sequence1.AQETSGEEIS[Pho]KFYLPNC[CAM]NK.+3y14+3.light      | 38               |
| 746.66         | 376.20      | sequence1.AQETSGEEIS[Pho]KFYLPNC[CAM]NK.+3y9+3.light       | 38               |
| 746.66         | 230.12      | sequence1.AQETSGEEIS[Pho]KFYLPNC[CAM]NK.+3y6+3.light       | 38               |
| 746.66         | 200.10      | sequence1.AQETSGEEIS[Pho]KFYLPNC[CAM]NK.+3b2.light         | 38               |
| 746.66         | 329.15      | sequence1.AQETSGEEIS[Pho]KFYLPNC[CAM]NK.+3b3.light         | 38               |
| 746.66         | 215.60      | sequence1.AQETSGEEIS[Pho]KFYLPNC[CAM]NK.+3b4+2.light       | 38               |
| 746.66         | 694.29      | sequence1.AQETSGEEIS[Pho]KFYLPNC[CAM]NK.+3b12+2.light      | 38               |
| 746.66         | 1046.44     | sequence1.AQETSGEEIS[Pho]KFYLPNC[CAM]NK.+3b18+2.light      | 38               |
| 746.66         | 173.08      | sequence1.AQETSGEEIS[Pho]KFYLPNC[CAM]NK.+3b5+3.light       | 38               |
| 746.66         | 192.09      | sequence1.AQETSGEEIS[Pho]KFYLPNC[CAM]NK.+3b6+3.light       | 38               |
| 746.66         | 315.81      | sequence1.AQETSGEEIS[Pho]KFYLPNC[CAM]NK.+3b9+3.light       | 38               |
| 746.66         | 463.20      | sequence1.AQETSGEEIS[Pho]KFYLPNC[CAM]NK.+3b12+3.light      | 38               |
| 746.66         | 625.61      | sequence1.AQETSGEEIS[Pho]KFYLPNC[CAM]NK.+3b16+3.light      | 38               |
| 746.66         | 575.26      | sequence1.AQETS[Pho]GEEISKFYLPNC[CAM]NK.+3y5.light         | 38               |
| 746.66         | 261.16      | sequence1.AQETS[Pho]GEEISKFYLPNC[CAM]NK.+3y2.light         | 38               |
| 746.66         | 904.90      | sequence1.AQETS[Pho]GEEISKFYLPNC[CAM]NK.+3y15+2.light      | 38               |
| 746.66         | 821.40      | sequence1.AQETS[Pho]GEEISKFYLPNC[CAM]NK.+3y14+2.light      | 38               |
| 746.66         | 426.21      | sequence1.AQETS[Pho]GEEISKFYLPNC[CAM]NK.+3y7+2.light       | 38               |
| 746.66         | 547.94      | sequence1.AQETS[Pho]GEEISKFYLPNC[CAM]NK.+3y14+3.light      | 38               |

| <b>Precursor ions</b> | <b>Transitions</b> | <b>Peptide Sequence</b>                                           | <b>Collision Energy</b> |
|-----------------------|--------------------|-------------------------------------------------------------------|-------------------------|
| 746.66                | 376.20             | sequence1.AQETS[Pho]GEEISKFYLPNC[CAM]NK.+3y9+3.light              | 38                      |
| 746.66                | 230.12             | sequence1.AQETS[Pho]GEEISKFYLPNC[CAM]NK.+3y6+3.light              | 38                      |
| 746.66                | 200.10             | sequence1.AQETS[Pho]GEEISKFYLPNC[CAM]NK.+3b2.light                | 38                      |
| 746.66                | 329.15             | sequence1.AQETS[Pho]GEEISKFYLPNC[CAM]NK.+3b3.light                | 38                      |
| 746.66                | 215.60             | sequence1.AQETS[Pho]GEEISKFYLPNC[CAM]NK.+3b4+2.light              | 38                      |
| 746.66                | 694.29             | sequence1.AQETS[Pho]GEEISKFYLPNC[CAM]NK.+3b12+2.light             | 38                      |
| 746.66                | 1046.44            | sequence1.AQETS[Pho]GEEISKFYLPNC[CAM]NK.+3b18+2.light             | 38                      |
| 746.66                | 199.74             | sequence1.AQETS[Pho]GEEISKFYLPNC[CAM]NK.+3b5+3.light              | 38                      |
| 746.66                | 218.74             | sequence1.AQETS[Pho]GEEISKFYLPNC[CAM]NK.+3b6+3.light              | 38                      |
| 746.66                | 342.47             | sequence1.AQETS[Pho]GEEISKFYLPNC[CAM]NK.+3b9+3.light              | 38                      |
| 746.66                | 463.20             | sequence1.AQETS[Pho]GEEISKFYLPNC[CAM]NK.+3b12+3.light             | 38                      |
| 746.66                | 625.61             | sequence1.AQETS[Pho]GEEISKFYLPNC[CAM]NK.+3b16+3.light             | 38                      |
| 720.01                | 575.26             | sequence1.AQETSGEEISKFYLPNC[CAM]NK.+3y5.light                     | 37                      |
| 720.01                | 261.16             | sequence1.AQETSGEEISKFYLPNC[CAM]NK.+3y2.light                     | 37                      |
| 720.01                | 864.92             | sequence1.AQETSGEEISKFYLPNC[CAM]NK.+3y15+2.light                  | 37                      |
| 720.01                | 821.40             | sequence1.AQETSGEEISKFYLPNC[CAM]NK.+3y14+2.light                  | 37                      |
| 720.01                | 426.21             | sequence1.AQETSGEEISKFYLPNC[CAM]NK.+3y7+2.light                   | 37                      |
| 720.01                | 547.94             | sequence1.AQETSGEEISKFYLPNC[CAM]NK.+3y14+3.light                  | 37                      |
| 720.01                | 376.20             | sequence1.AQETSGEEISKFYLPNC[CAM]NK.+3y9+3.light                   | 37                      |
| 720.01                | 230.12             | sequence1.AQETSGEEISKFYLPNC[CAM]NK.+3y6+3.light                   | 37                      |
| 720.01                | 200.10             | sequence1.AQETSGEEISKFYLPNC[CAM]NK.+3b2.light                     | 37                      |
| 720.01                | 329.15             | sequence1.AQETSGEEISKFYLPNC[CAM]NK.+3b3.light                     | 37                      |
| 720.01                | 215.60             | sequence1.AQETSGEEISKFYLPNC[CAM]NK.+3b4+2.light                   | 37                      |
| 720.01                | 654.31             | sequence1.AQETSGEEISKFYLPNC[CAM]NK.+3b12+2.light                  | 37                      |
| 720.01                | 1006.46            | sequence1.AQETSGEEISKFYLPNC[CAM]NK.+3b18+2.light                  | 37                      |
| 720.01                | 173.08             | sequence1.AQETSGEEISKFYLPNC[CAM]NK.+3b5+3.light                   | 37                      |
| 720.01                | 192.09             | sequence1.AQETSGEEISKFYLPNC[CAM]NK.+3b6+3.light                   | 37                      |
| 720.01                | 315.81             | sequence1.AQETSGEEISKFYLPNC[CAM]NK.+3b9+3.light                   | 37                      |
| 720.01                | 436.54             | sequence1.AQETSGEEISKFYLPNC[CAM]NK.+3b12+3.light                  | 37                      |
| 720.01                | 598.96             | sequence1.AQETSGEEISKFYLPNC[CAM]NK.+3b16+3.light                  | 37                      |
| 976.40                | 1076.54            | sequence1.DASAPHAEEAGSPES[Pho]PES[Pho]TEITEEELL.+3y9.light        | 51                      |
| 976.40                | 975.49             | sequence1.DASAPHAEEAGSPES[Pho]PES[Pho]TEITEEELL.+3y8.light        | 51                      |
| 976.40                | 503.27             | sequence1.DASAPHAEEAGSPES[Pho]PES[Pho]TEITEEELL.+3y4.light        | 51                      |
| 976.40                | 245.19             | sequence1.DASAPHAEEAGSPES[Pho]PES[Pho]TEITEEELL.+3y2.light        | 51                      |
| 976.40                | 1292.02            | sequence1.DASAPHAEEAGSPES[Pho]PES[Pho]TEITEEELL.+3y23+2.1<br>ight | 51                      |
| 976.40                | 1103.93            | sequence1.DASAPHAEEAGSPES[Pho]PES[Pho]TEITEEELL.+3y19+2.1<br>ight | 51                      |
| 976.40                | 1003.89            | sequence1.DASAPHAEEAGSPES[Pho]PES[Pho]TEITEEELL.+3y17+2.1<br>ight | 51                      |
| 976.40                | 931.87             | sequence1.DASAPHAEEAGSPES[Pho]PES[Pho]TEITEEELL.+3y15+2.1<br>ight | 51                      |
| 976.40                | 883.34             | sequence1.DASAPHAEEAGSPES[Pho]PES[Pho]TEITEEELL.+3y14+2.1<br>ight | 51                      |
| 976.40                | 735.32             | sequence1.DASAPHAEEAGSPES[Pho]PES[Pho]TEITEEELL.+3y12+2.1<br>ight | 51                      |
| 976.40                | 488.25             | sequence1.DASAPHAEEAGSPES[Pho]PES[Pho]TEITEEELL.+3y8+2.li<br>ght  | 51                      |
| 976.40                | 621.58             | sequence1.DASAPHAEEAGSPES[Pho]PES[Pho]TEITEEELL.+3y15+3.1<br>ight | 51                      |
| 976.40                | 458.20             | sequence1.DASAPHAEEAGSPES[Pho]PES[Pho]TEITEEELL.+3y11+3.1<br>ight | 51                      |

| Precursor ions | Transitions | Peptide Sequence                                                    | Collision Energy |
|----------------|-------------|---------------------------------------------------------------------|------------------|
| 976.40         | 978.43      | sequence1.DASAPHA AEAGSPES[Pho]PES[Pho]TEIT EEELL.+3b11.lig<br>ht   | 51               |
| 976.40         | 1458.55     | sequence1.DASAPHA AEAGSPES[Pho]PES[Pho]TEIT EEELL.+3b15.lig<br>ht   | 51               |
| 976.40         | 173.07      | sequence1.DASAPHA AEAGSPES[Pho]PES[Pho]TEIT EEELL.+3b4+2.li<br>ght  | 51               |
| 976.40         | 1097.91     | sequence1.DASAPHA AEAGSPES[Pho]PES[Pho]TEIT EEELL.+3b21+2.l<br>ight | 51               |
| 976.40         | 388.18      | sequence1.DASAPHA AEAGSPES[Pho]PES[Pho]TEIT EEELL.+3b13+3.l<br>ight | 51               |
| 976.40         | 562.22      | sequence1.DASAPHA AEAGSPES[Pho]PES[Pho]TEIT EEELL.+3b17+3.l<br>ight | 51               |
| 949.74         | 1076.54     | sequence1.DASAPHA AEAGSPESPE[Pho]TEIT EEELL.+3y9.light              | 49               |
| 949.74         | 975.49      | sequence1.DASAPHA AEAGSPESPE[Pho]TEIT EEELL.+3y8.light              | 49               |
| 949.74         | 503.27      | sequence1.DASAPHA AEAGSPESPE[Pho]TEIT EEELL.+3y4.light              | 49               |
| 949.74         | 245.19      | sequence1.DASAPHA AEAGSPESPE[Pho]TEIT EEELL.+3y2.light              | 49               |
| 949.74         | 1252.04     | sequence1.DASAPHA AEAGSPESPE[Pho]TEIT EEELL.+3y23+2.light           | 49               |
| 949.74         | 1063.95     | sequence1.DASAPHA AEAGSPESPE[Pho]TEIT EEELL.+3y19+2.light           | 49               |
| 949.74         | 963.91      | sequence1.DASAPHA AEAGSPESPE[Pho]TEIT EEELL.+3y17+2.light           | 49               |
| 949.74         | 891.88      | sequence1.DASAPHA AEAGSPESPE[Pho]TEIT EEELL.+3y15+2.light           | 49               |
| 949.74         | 843.36      | sequence1.DASAPHA AEAGSPESPE[Pho]TEIT EEELL.+3y14+2.light           | 49               |
| 949.74         | 735.32      | sequence1.DASAPHA AEAGSPESPE[Pho]TEIT EEELL.+3y12+2.light           | 49               |
| 949.74         | 488.25      | sequence1.DASAPHA AEAGSPESPE[Pho]TEIT EEELL.+3y8+2.light            | 49               |
| 949.74         | 594.92      | sequence1.DASAPHA AEAGSPESPE[Pho]TEIT EEELL.+3y15+3.light           | 49               |
| 949.74         | 458.20      | sequence1.DASAPHA AEAGSPESPE[Pho]TEIT EEELL.+3y11+3.light           | 49               |
| 949.74         | 978.43      | sequence1.DASAPHA AEAGSPESPE[Pho]TEIT EEELL.+3b11.light             | 49               |
| 949.74         | 1378.59     | sequence1.DASAPHA AEAGSPESPE[Pho]TEIT EEELL.+3b15.light             | 49               |
| 949.74         | 173.07      | sequence1.DASAPHA AEAGSPESPE[Pho]TEIT EEELL.+3b4+2.light            | 49               |
| 949.74         | 1057.93     | sequence1.DASAPHA AEAGSPESPE[Pho]TEIT EEELL.+3b21+2.light           | 49               |
| 949.74         | 388.18      | sequence1.DASAPHA AEAGSPESPE[Pho]TEIT EEELL.+3b13+3.light           | 49               |
| 949.74         | 535.57      | sequence1.DASAPHA AEAGSPESPE[Pho]TEIT EEELL.+3b17+3.light           | 49               |
| 923.09         | 1076.54     | sequence1.DASAPHA AEAGSPESPESTEIT EEELL.+3y9.light                  | 48               |
| 923.09         | 975.49      | sequence1.DASAPHA AEAGSPESPESTEIT EEELL.+3y8.light                  | 48               |
| 923.09         | 503.27      | sequence1.DASAPHA AEAGSPESPESTEIT EEELL.+3y4.light                  | 48               |
| 923.09         | 245.19      | sequence1.DASAPHA AEAGSPESPESTEIT EEELL.+3y2.light                  | 48               |
| 923.09         | 1212.06     | sequence1.DASAPHA AEAGSPESPESTEIT EEELL.+3y23+2.light               | 48               |
| 923.09         | 1023.97     | sequence1.DASAPHA AEAGSPESPESTEIT EEELL.+3y19+2.light               | 48               |
| 923.09         | 923.93      | sequence1.DASAPHA AEAGSPESPESTEIT EEELL.+3y17+2.light               | 48               |
| 923.09         | 851.90      | sequence1.DASAPHA AEAGSPESPESTEIT EEELL.+3y15+2.light               | 48               |
| 923.09         | 803.37      | sequence1.DASAPHA AEAGSPESPESTEIT EEELL.+3y14+2.light               | 48               |
| 923.09         | 695.34      | sequence1.DASAPHA AEAGSPESPESTEIT EEELL.+3y12+2.light               | 48               |
| 923.09         | 488.25      | sequence1.DASAPHA AEAGSPESPESTEIT EEELL.+3y8+2.light                | 48               |
| 923.09         | 568.27      | sequence1.DASAPHA AEAGSPESPESTEIT EEELL.+3y15+3.light               | 48               |
| 923.09         | 431.54      | sequence1.DASAPHA AEAGSPESPESTEIT EEELL.+3y11+3.light               | 48               |
| 923.09         | 978.43      | sequence1.DASAPHA AEAGSPESPESTEIT EEELL.+3b11.light                 | 48               |
| 923.09         | 1378.59     | sequence1.DASAPHA AEAGSPESPESTEIT EEELL.+3b15.light                 | 48               |
| 923.09         | 173.07      | sequence1.DASAPHA AEAGSPESPESTEIT EEELL.+3b4+2.light                | 48               |
| 923.09         | 1017.95     | sequence1.DASAPHA AEAGSPESPESTEIT EEELL.+3b21+2.light               | 48               |
| 923.09         | 388.18      | sequence1.DASAPHA AEAGSPESPESTEIT EEELL.+3b13+3.light               | 48               |
| 923.09         | 535.57      | sequence1.DASAPHA AEAGSPESPESTEIT EEELL.+3b17+3.light               | 48               |



| <b>Precursor ions</b> | <b>Transitions</b> | <b>Peptide Sequence</b>                 | <b>Collision Energy</b> |
|-----------------------|--------------------|-----------------------------------------|-------------------------|
| 685.26                | 541.15             | sequence1.DNFHLMAPS[Pho]EE.+2y4.light   | 34                      |
| 685.26                | 428.66             | sequence1.DNFHLMAPS[Pho]EE.+2y7+2.light | 34                      |
| 685.26                | 372.12             | sequence1.DNFHLMAPS[Pho]EE.+2y6+2.light | 34                      |
| 685.26                | 306.60             | sequence1.DNFHLMAPS[Pho]EE.+2y5+2.light | 34                      |
| 685.26                | 230.08             | sequence1.DNFHLMAPS[Pho]EE.+2b2.light   | 34                      |
| 685.26                | 377.15             | sequence1.DNFHLMAPS[Pho]EE.+2b3.light   | 34                      |
| 685.26                | 829.37             | sequence1.DNFHLMAPS[Pho]EE.+2b7.light   | 34                      |
| 685.26                | 463.71             | sequence1.DNFHLMAPS[Pho]EE.+2b8+2.light | 34                      |
| 685.26                | 547.21             | sequence1.DNFHLMAPS[Pho]EE.+2b9+2.light | 34                      |
| 645.28                | 461.19             | sequence1.DNFHLMAPSEE.+2y4.light        | 32                      |
| 645.28                | 388.68             | sequence1.DNFHLMAPSEE.+2y7+2.light      | 32                      |
| 645.28                | 332.14             | sequence1.DNFHLMAPSEE.+2y6+2.light      | 32                      |
| 645.28                | 266.62             | sequence1.DNFHLMAPSEE.+2y5+2.light      | 32                      |
| 645.28                | 230.08             | sequence1.DNFHLMAPSEE.+2b2.light        | 32                      |
| 645.28                | 377.15             | sequence1.DNFHLMAPSEE.+2b3.light        | 32                      |
| 645.28                | 829.37             | sequence1.DNFHLMAPSEE.+2b7.light        | 32                      |
| 645.28                | 463.71             | sequence1.DNFHLMAPSEE.+2b8+2.light      | 32                      |
| 645.28                | 507.23             | sequence1.DNFHLMAPSEE.+2b9+2.light      | 32                      |

**Supplemental Table 3. IGFBP-1 phosphopeptide peak intensity using MRM MS analysis of cell media from rapamycin and hypoxia treated HepG2 cells**

| <b>Precursor ion</b> | <b>PeptideSequence</b>                 | <b>Peak Intensity (Control)</b> | <b>Peak Intensity (Rapa)</b> | <b>Peak Intensity (Hypoxia)</b> | <b>Peak Intensity (Rapa + Hypoxia)</b> |
|----------------------|----------------------------------------|---------------------------------|------------------------------|---------------------------------|----------------------------------------|
| 765.92               | ALPGEQQLHALTR                          | 12578                           | 23741                        | 5416                            | 4880                                   |
| 773.32               | AQETS[Pho]GEEIS[Pho]KFYLPNC[CAM]NK     | 8470                            | 24962                        | 24273                           | 6555                                   |
| 746.66               | AQETS[Pho]GEEISKFYLPNC[CAM]NK          | 7729                            | 33732                        | 7819                            | 10280                                  |
| 720.01               | AQETSGEEISKFYLPNC[CAM]NK               | 8123                            | 13649                        | 7463                            | 5193                                   |
| 976.40               | DASAPHA AEAGSPES[Pho]PES[Pho]TEITEEELL | 19386                           | 9227                         | 13799                           | 11543                                  |
| 949.74               | DASAPHA AEAGSPESPES[Pho]TEITEEELL      | 16342                           | 7260                         | 11088                           | 17250                                  |
| 923.09               | DASAPHA AEAGSPESPESTEITEEELL           | 6458                            | 1513                         | 3245                            | 2875                                   |
| 685.26               | DNFHLMAPS[Pho]EE                       | 19386                           | 9227                         | 13799                           | 11543                                  |
| 645.28               | DNFHLMAPSEE                            | 8764                            | 1624                         | 1589                            | 1657                                   |

**Table S4. IGFBP-1 phosphopeptide peak intensity using MRM MS analysis of cell media from HepG2 cells treated for mTORC1 + C2 activation by DEPTOR silencing**

| <b>Precursor ion</b> | <b>PeptideSequence</b>             | <b>Peak Intensity (Scrambled siRNA)</b> | <b>Peak Intensity (DEPTOR siRNA)</b> | <b>Peak Intensity (DEPTOR siRNA + Hypoxia)</b> |
|----------------------|------------------------------------|-----------------------------------------|--------------------------------------|------------------------------------------------|
| 773.32               | AQETS[Pho]GEEIS[Pho]KFYLPNC[CAM]NK | 8215                                    | 704                                  | 578                                            |
| 746.66               | AQETS[Pho]GEEISKFYLPNC[CAM]NK      | 740                                     | 211                                  | 234                                            |
| 746.66               | AQETSGEEIS[Pho]KFYLPNC[CAM]NK      | 881                                     | 193                                  | 251                                            |
| 720.01               | AQETSGEEISKFYLPNC[CAM]NK           | 9526                                    | 7548                                 | 4898                                           |

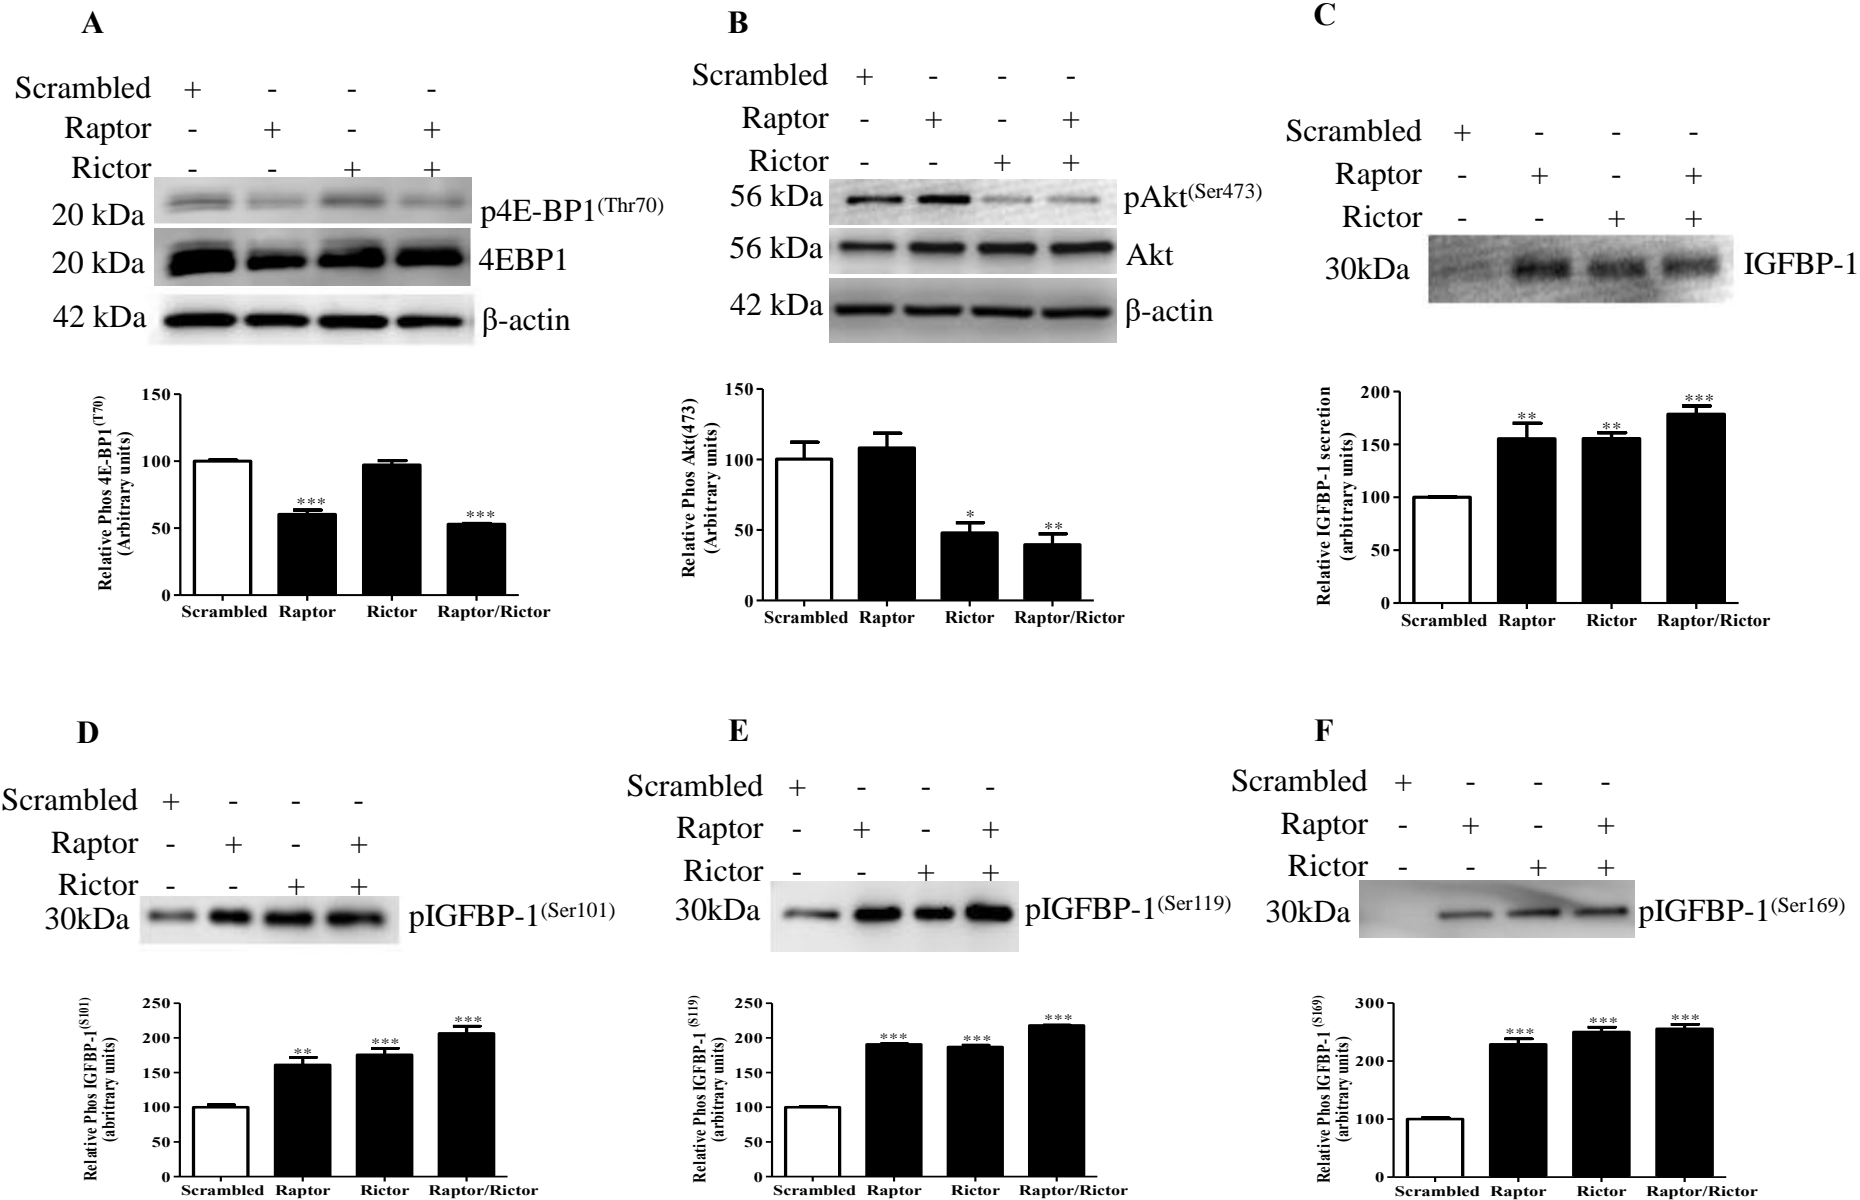

**Figure S1 (A-F)**

**A****B****Figure S2 (A-B)**

C

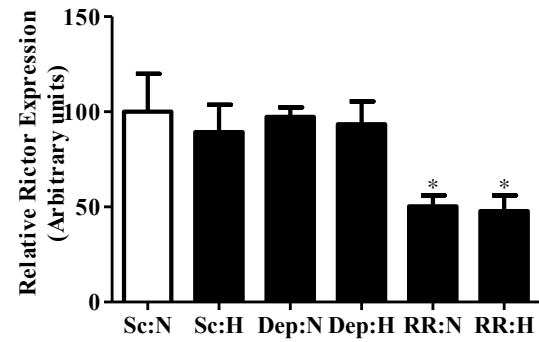

Figure S2 (C)

**A**

|           |   |   |   |   |   |   |   |   |
|-----------|---|---|---|---|---|---|---|---|
| Scrambled | + | + | - | - | - | - | - | - |
| TSC2      | - | - | + | + | - | - | - | - |
| Raptor    | - | - | - | - | + | + | - | - |
| Rictor    | - | - | - | - | - | - | + | + |
| Hypoxia   | - | + | - | + | - | + | - | + |

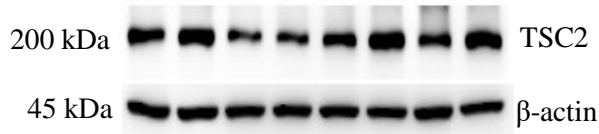**B**

|           |   |   |   |   |   |   |   |   |
|-----------|---|---|---|---|---|---|---|---|
| Scrambled | + | + | - | - | - | - | - | - |
| TSC2      | - | - | + | + | - | - | - | - |
| Raptor    | - | - | - | - | + | + | - | - |
| Rictor    | - | - | - | - | - | - | + | + |
| Hypoxia   | - | + | - | + | - | + | - | + |

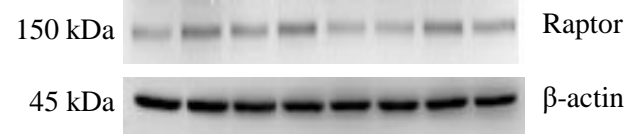**Figure S3 (A-B)**

C

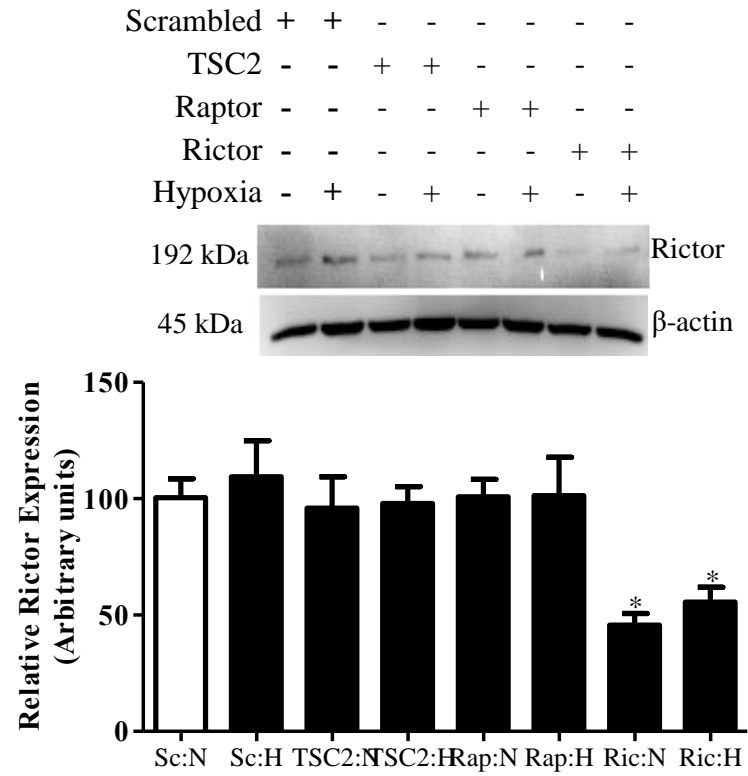

Figure S3 (C)



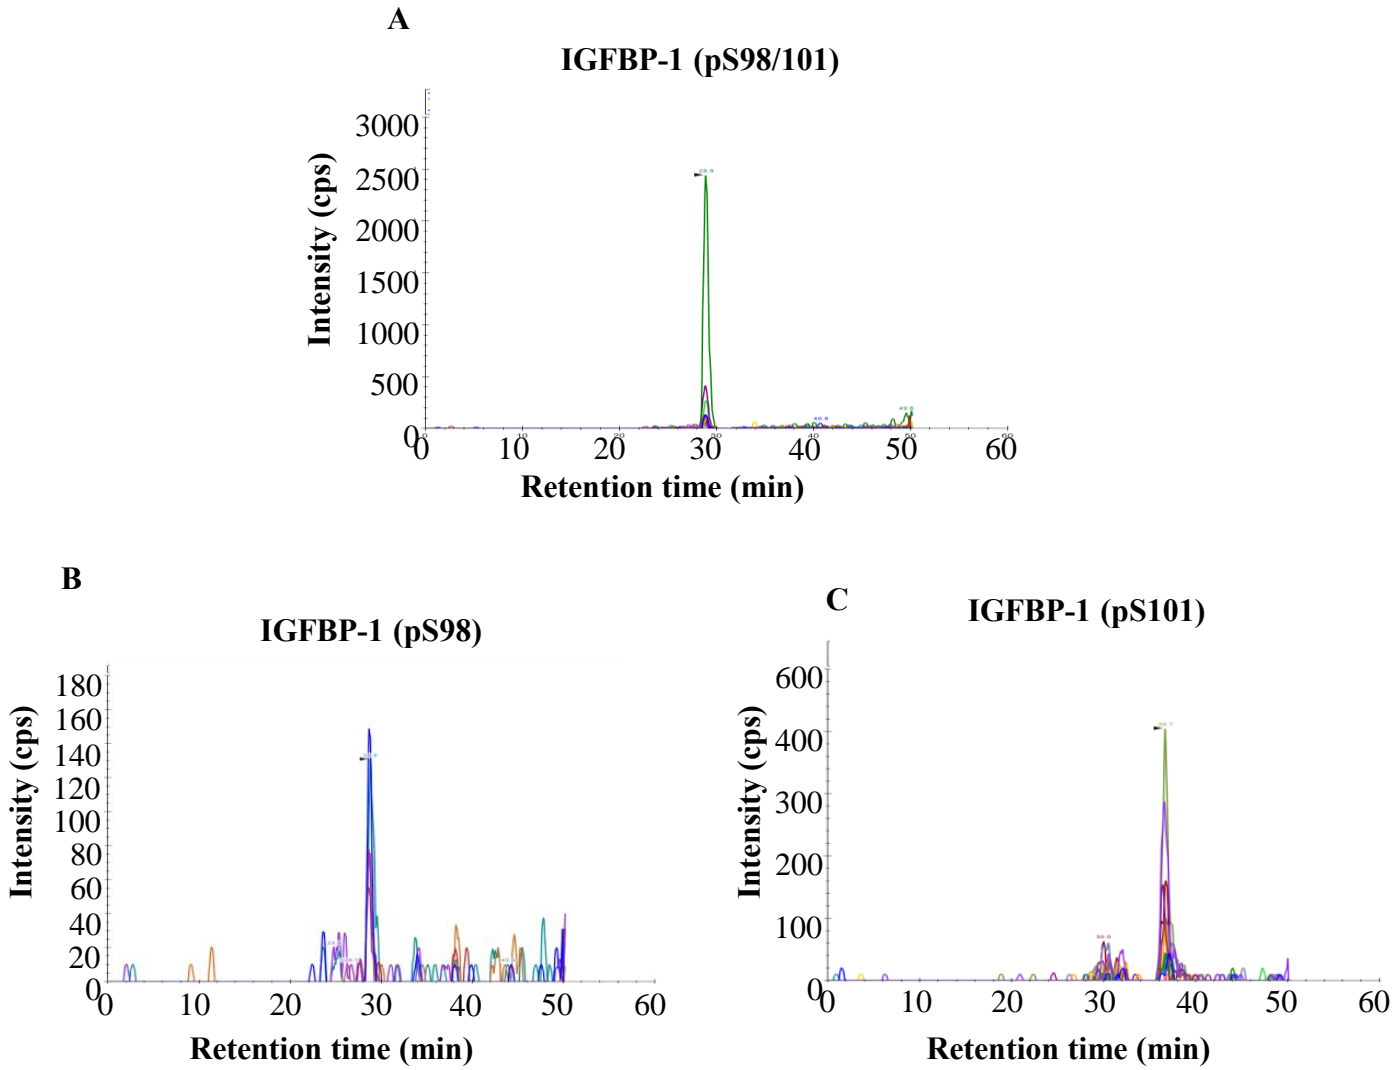

**Figure S4 (A-C)**

**D**



**Figure S4 (D)**

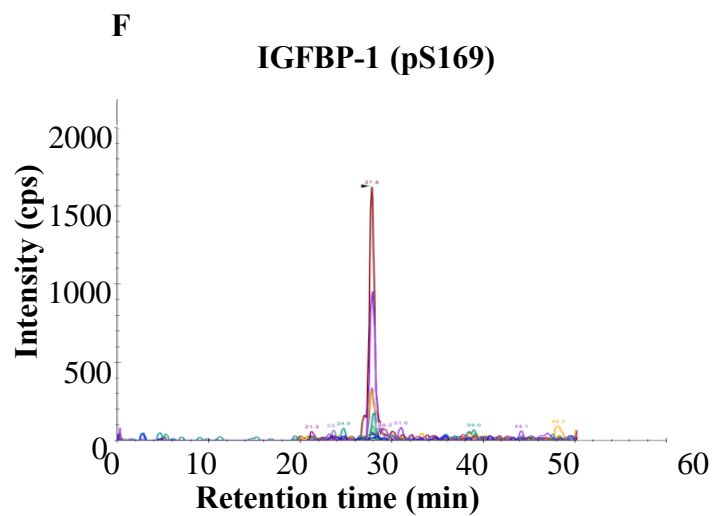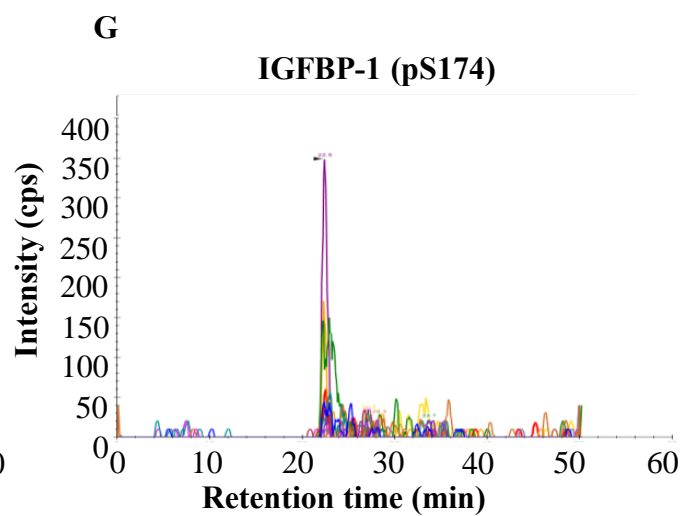

**Figure S4 (E-G)**

**H Standard IGFBP-1 internal peptide**

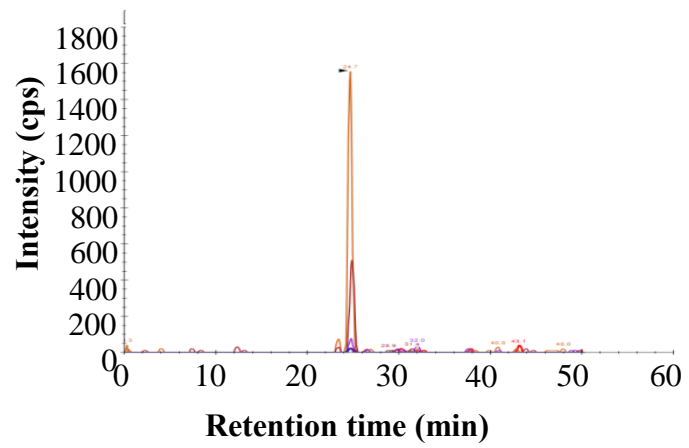

**Figure S4 (H)**

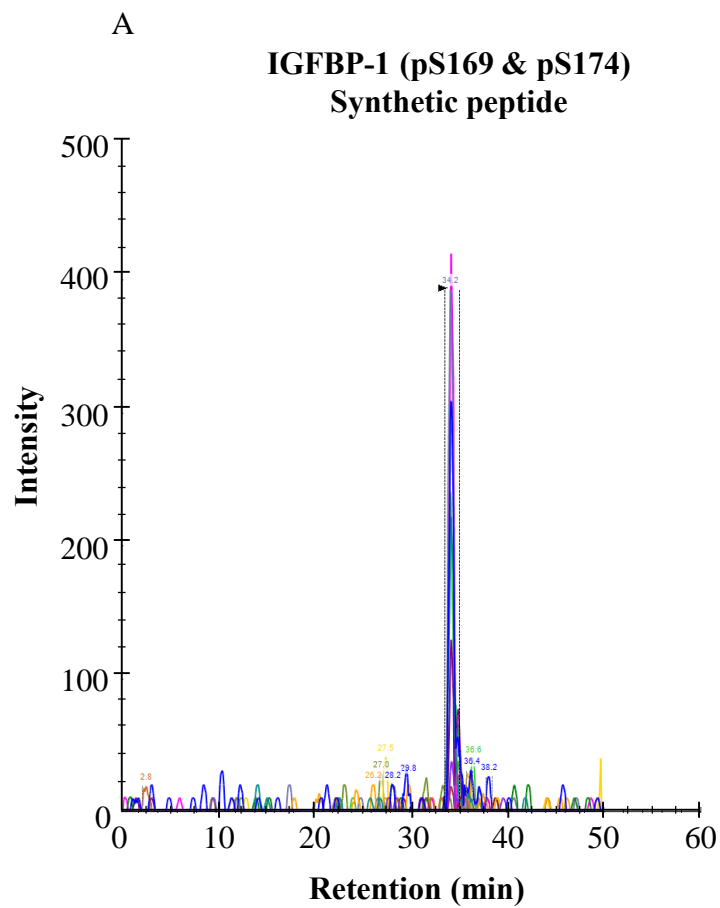

**Figure S5 (A-B)**

### **Supplemental Figure 1. The effect of raptor and rictor silencing on IGFBP-1 secretion and phosphorylation**

Representative western blot of A. mTORC1 readout 4E-BP1 (Thr70) and B. mTORC2 readout Akt (Ser473) phosphorylation in HepG2 cell lysates. Raptor and raptor+rictor silencing inhibited 4E-BP1 phosphorylation while rictor and raptor+rictor silencing both inhibited Akt phosphorylation to similar degrees. Western blot using equal aliquots of cell media of scrambled, raptor, rictor, and combined raptor+rictor siRNA treated HepG2 cells. Raptor, rictor, and combined raptor+rictor siRNA all significantly increased. C. IGFBP-1 secretion and D-F. IGFBP-1 phosphorylation at Ser101, Ser119 and Ser169, suggesting that inhibition of either complex is sufficient to induce IGFBP-1 secretion and phosphorylation. Values are displayed as mean  $\pm$  SEM. \* $p < 0.05$ , \*\* $p = 0.001-0.05$ , \*\*\* $p < 0.0001$ ;

### **Supplemental Figure 2. Validation of DEPTOR, raptor, and rictor siRNA on respective protein expression levels under hypoxia**

Representative western blots of equal concentration of cell lysate protein from HepG2 cells transfected with scramble (normoxia), scramble (hypoxia), DEPTOR (normoxia), DEPTOR (hypoxia), raptor+rictor (normoxia) and raptor+rictor (hypoxia) siRNA. siRNA silencing of A. DEPTOR, B. Raptor and C. Rictor. DEPTOR significantly decreased total DEPTOR protein expression, regardless of hypoxic status. DEPTOR silencing did not affect either raptor or rictor protein expression. Raptor siRNA silencing decreased only raptor protein expression regardless of hypoxic status. Similarly rictor siRNA silencing specifically decreased rictor protein expression regardless of hypoxic status. Values are displayed as mean  $\pm$  SEM. \* $p < 0.05$ , \*\* $p =$

0.001-0.05, \*\*\* $p < 0.0001$ . versus control; One-way analysis of variance; Dunnet's Multiple Comparison Test.

### **Supplemental Figure 3. Validation of TSC2, raptor, and rictor siRNA on respective protein expression levels under hypoxia**

Representative western blots of equal cell lysate protein from HepG2 cells transfected with scramble (normoxia), scramble (hypoxia), TSC2 (normoxia), TSC2 (hypoxia), raptor (normoxia), raptor (hypoxia), rictor (normoxia) and rictor (hypoxia) siRNA. siRNA silencing of **A. TSC2**, **B. Raptor** and **C. Rictor**. TSC2 significantly decreased total TSC2 protein expression regardless of hypoxic status. Raptor siRNA significantly decreased specifically total raptor protein expression, regardless of hypoxic status. Rictor siRNA significantly decreased only rictor protein expression, regardless of hypoxic status. Values are displayed as mean  $\pm$  SEM. \* $p < 0.05$ , \*\* $p = 0.001-0.05$ , \*\*\* $p < 0.0001$ . versus control; One-way analysis of variance; Dunnet's Multiple Comparison Test.

### **Supplemental Figure 4. Representative MRM spectra of identified phosphorylation sites**

Immunoprecipitated IGFBP-1 samples or a standard synthetic IGFBP-1 internal peptide was digested by respective enzymes to generate appropriate peptide fragments. MRM transitions were predicted by Skyline and the transitions **A-H** representing the modification sites on IGFBP-1 singly and in combination were chosen to distinguish from other serine residues.

### **Supplemental Figure 5. MRM spectra of synthetic IGFBP-1 peptides containing the novel Ser174 phosphorylation modification**

Synthetic peptides of the digested fragment of IGFBP-1 containing either **A.** pSer174 or **B.** pSer169+pSer174 phosphorylation. Synthetic peptides were used to validate the transitions used to detect the novel pSer174 phosphorylation site within IGFBP-1.
